# Supplementary material
Source: PubMed Central journal article supplement (PMC3531795)

# Supporting Information

## **Chiral Anion Dependent Inversion of Diastereo- and Enantioselectivity in Carbonyl Crotylation *via* Ruthenium Catalyzed Butadiene Hydrohydroxyalkylation**

**Emma L. McInturff, Eiji Yamaguchi, and Michael J. Krische\***

*University of Texas at Austin, Department of Chemistry and Biochemistry  
Austin, TX 78712*

*mkrische@mail.utexas.edu*

| Table of Contents                                                | pg  |
|------------------------------------------------------------------|-----|
| General Information                                              | S2  |
| Spectroscopy and Spectrometry                                    | S2  |
| Procedures and Spectroscopic Data for Alcohols <b>2a-2j</b>      | S3  |
| Synthesis of TADDOL-derived phosphoric acid <b>A<sub>6</sub></b> | S43 |

**General Information:** All reactions were run under an atmosphere of argon. Tetrahydrofuran (THF), dichloromethane and toluene were obtained from Pure-Solv MD-5 Solvent Purification System (Innovative Technology). Anhydrous solvents were transferred by oven-dried syringe. Sealed tubes (13×100 mm<sup>2</sup>) were purchased from Fisher Scientific (catalog number 14-959-35C) and were dried in an oven overnight and cooled under a stream of argon prior to use. RuH<sub>2</sub>(CO)(PPh<sub>3</sub>)<sub>3</sub> and (*R*)-H<sub>8</sub>-Mes-Et BINOL phosphoric acid was prepared according to literature procedure.<sup>1,2</sup> All ligands were used as received from Strem Chemicals Inc. Alcohols were purified by distillation immediately prior to use. Preparative column chromatography employing silica gel was performed according to the method of Still.<sup>3</sup> Analytical thin-layer chromatography (TLC) was carried out using 0.25 mm commercial silica gel plates (Dynamic Adsorbents F254). Visualization was accomplished with UV light followed by dipping in a *p-anisaldehyde* solution and heating. Purification of reaction products was carried out by flash column chromatography using Silicycle silica gel (40-63 μm).

**Spectroscopy and Spectrometry:** Infrared spectra were recorded on a Thermo Nicolet 380 spectrometer. High-resolution mass spectra (HRMS) were obtained on a Karatos MS9 and are reported as m/z (relative intensity). Accurate masses are reported for the molecular ion (M+H, M or M-H) or a suitable fragment ion. <sup>1</sup>H NMR spectra were recorded on a Varian Gemini (400 MHz) spectrometer at ambient temperature unless otherwise noted. Chemical shifts are reported in delta (δ) units, parts per million (ppm) downfield from trimethylsilane or ppm relative to the center of the singlet at 7.26 ppm for deuteriochloroform. Data are reported as: multiplicity (s = singlet, d = doublet, t = triplet, q = quartet, m = multiplet), integration and coupling constant(s) in Hz. <sup>13</sup>C NMR spectra were recorded on a Varian Gemini (100 MHz) spectrometer and were routinely run with broadband decoupling. Chemical shifts are reported in ppm from tetramethylsilane, with the residual solvent resonance employed as the internal standard (CDCl<sub>3</sub> at 77.0 ppm).

---

<sup>1</sup> Joseph, T.; Deshpande, S. S.; Halligudi, B. S.; Vinu, A.; Ernst, S.; Hartmann, M. *J. Mol. Catal. A* **2003**, *206*, 13.

<sup>2</sup> Zbieg, J. R.; Yamaguchi, E.; McInturff, E. L.; Krische, M. *J. Science* **2012**, *336*, 324.

<sup>3</sup> Still, W. C.; Kahn, M.; Mitra, A. *J. Org. Chem.* **1978**, *43*, 2923.

## Procedures and Spectroscopic Data for Alcohols 2a-2j

### **(3*R*,4*R*)-3-methyl-1-decen-4-ol (2a)**

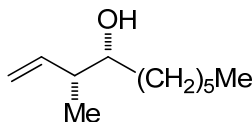

To a resealable pressure tube (13 x 100 mm) equipped with a magnetic stir bar was added RuH<sub>2</sub>(CO)(PPh<sub>3</sub>)<sub>3</sub> (19.3 mg, 0.021 mmol, 7 mol%), (*S*)-SEGPHOS (12.8 mg, 0.021 mmol, 7 mol%), TADDOL-phosphoric acid (29.3 mg, 0.042 mmol, 14 mol%). The tube was sealed with a rubber septum and purged with argon. Alcohol **1a** (42  $\mu$ L, 0.30 mmol, 100 mol%) and acetone (0.30 mL, 1.0 M concentration with respect to alcohol) were added and the solution was cooled to -78 °C. Butadiene (0.10 mL, 1.20 mmol, 400 mol%) was quickly added and the rubber septum was quickly replaced with a screw cap. The mixture was heated at 95 °C (oil bath temperature) for 3 days, at which point the reaction mixture was allowed to cool to ambient temperature. The reaction mixture was concentrated *in vacuo* and purified by flash column chromatography (SiO<sub>2</sub>; hexanes:ethyl acetate = 8:1) to furnish the title compound (42 mg, 0.25 mmol, *syn:anti* = 4.4:1, 95% ee) as a colorless oil in 82% yield.

**TLC (SiO<sub>2</sub>):** R<sub>f</sub> = 0.4 (hexanes:ethyl acetate = 5:1).

**<sup>1</sup>H NMR** (400 MHz, CDCl<sub>3</sub>):  $\delta$  5.77-5.72 (m, 1H), 5.06-4.99 (m, 2H), 3.44-3.39 (m, 1H), 2.25-2.15 (m, 1H), 1.57-1.16 (m, 10 H), 0.96 (d, *J* = 6.9 Hz, 3H), 0.81 (t, *J* = 6.7 Hz, 3H).

**<sup>13</sup>C NMR** (100 MHz, CDCl<sub>3</sub>):  $\delta$  114.1, 115.2, 74.7, 43.4, 34.0, 31.8, 29.4, 26.1, 22.6, 14.1, 14.0.

**LRMS** (CI+) *m/z* 171 [M+H]<sup>+</sup>.

**FTIR** (neat): 3392, 2957, 2927, 2856, 1458, 1119, 910, 733 cm<sup>-1</sup>.

**GC** Cyclosil-B: Initial temperature: 50 °C (5 min hold); 130 °C, rate: 3 °C/min) *t*<sub>minor</sub> = 28.7 min, *t*<sub>major</sub> = 28.9 min.

**[ $\alpha$ ]<sub>D</sub><sup>25</sup>** = 37.5° (*c* = 1.0, CHCl<sub>3</sub>).

*The spectroscopic properties of this compound were consistent with the data available in the literature.*<sup>4</sup>

<sup>4</sup> Marshall, M. J.; Palovich, R. M. *J. Org. Chem.* **1998**, *63*, 4381.

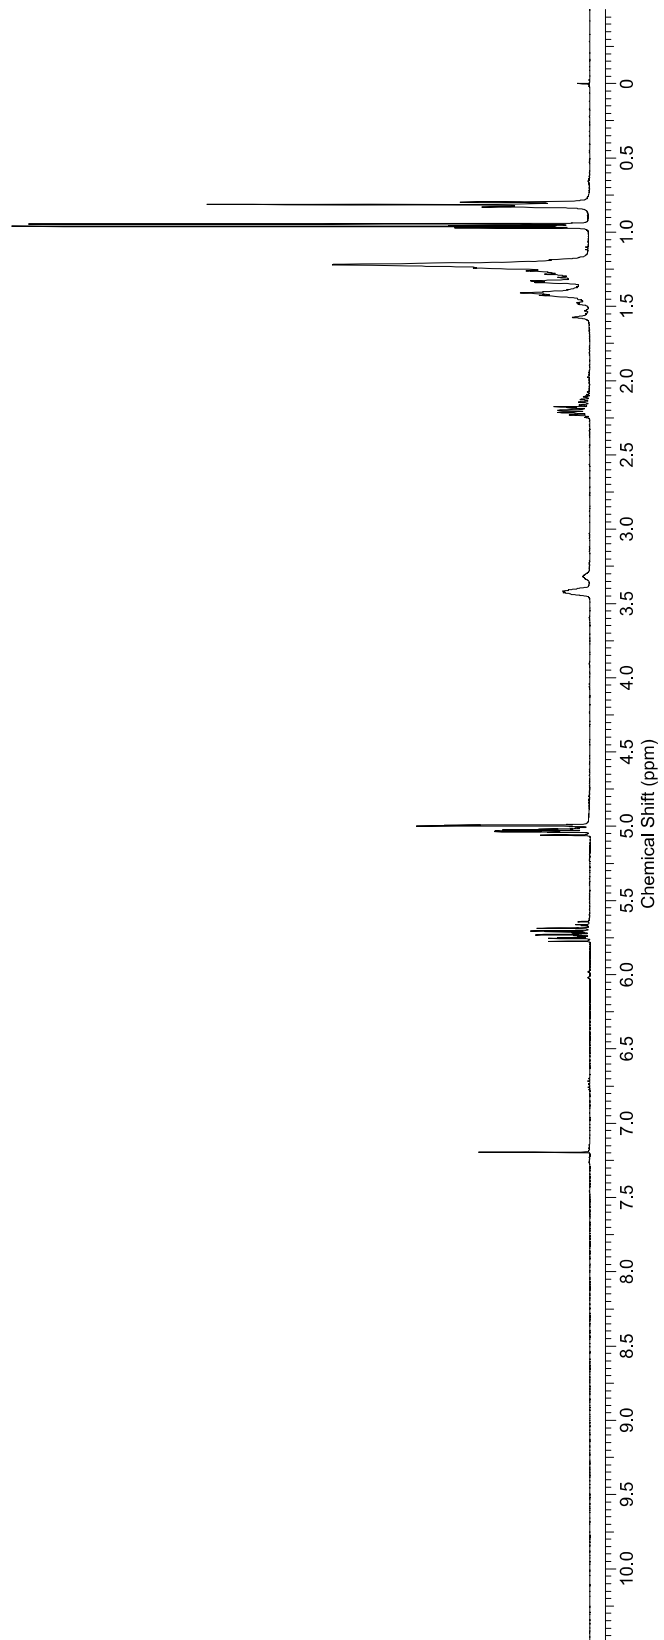

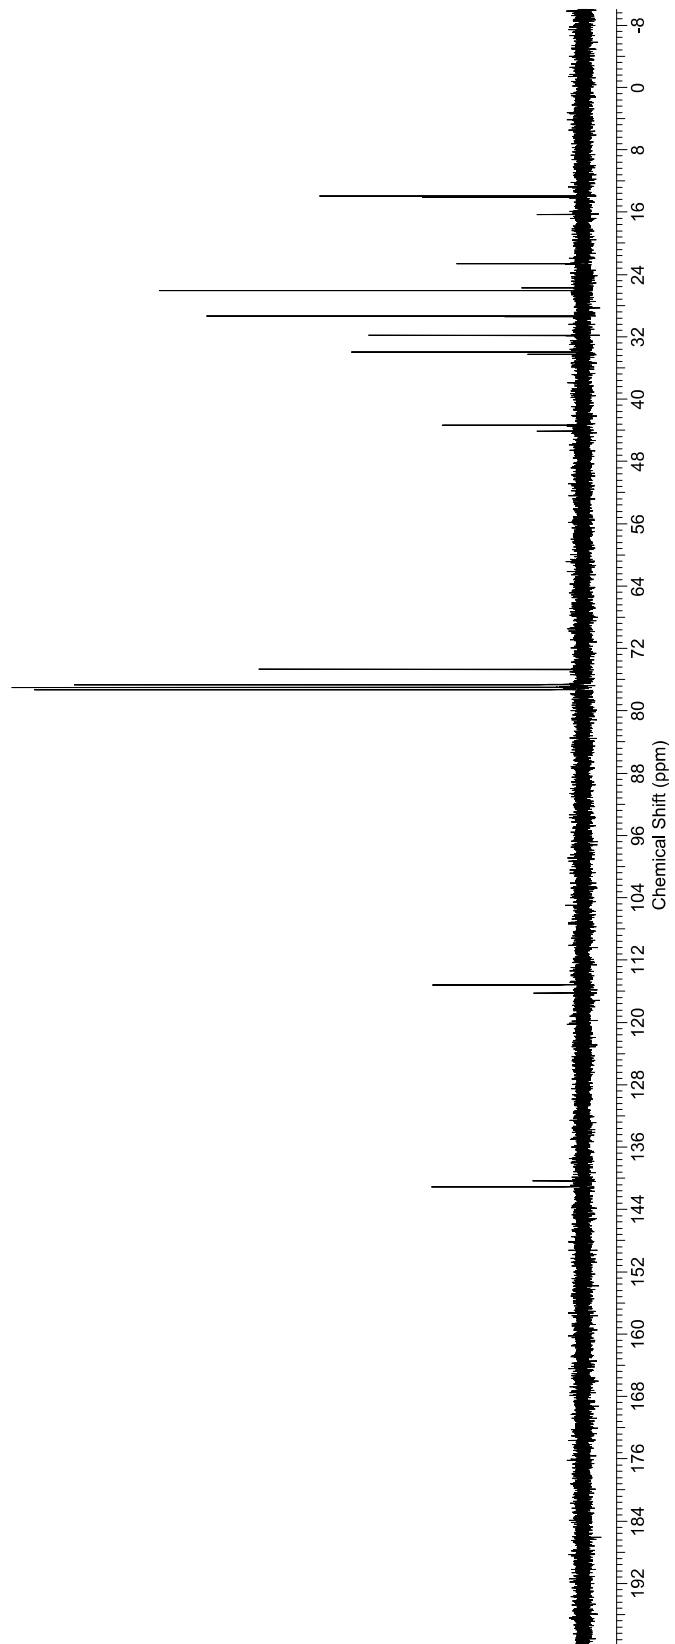

### GC (racemic)

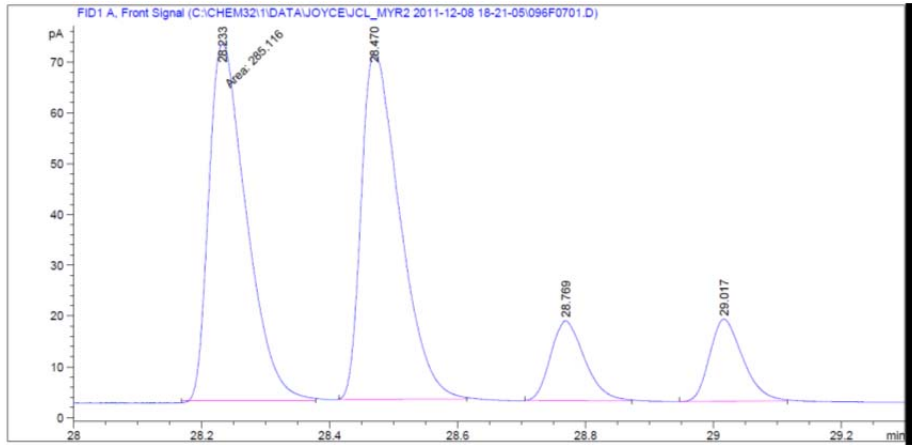

| Peak # | RetTime [min] | Type | Width [min] | Area [pA*s] | Height [pA] | Area %   |
|--------|---------------|------|-------------|-------------|-------------|----------|
| 1      | 28.233        | MM   | 0.0677      | 285.11609   | 70.14124    | 41.55134 |
| 2      | 28.470        | BB   | 0.0595      | 285.04620   | 67.68720    | 41.54115 |
| 3      | 28.769        | BB   | 0.0573      | 57.82202    | 15.73872    | 8.42668  |
| 4      | 29.017        | BB   | 0.0563      | 58.19354    | 16.19599    | 8.48082  |

### GC (chiral)

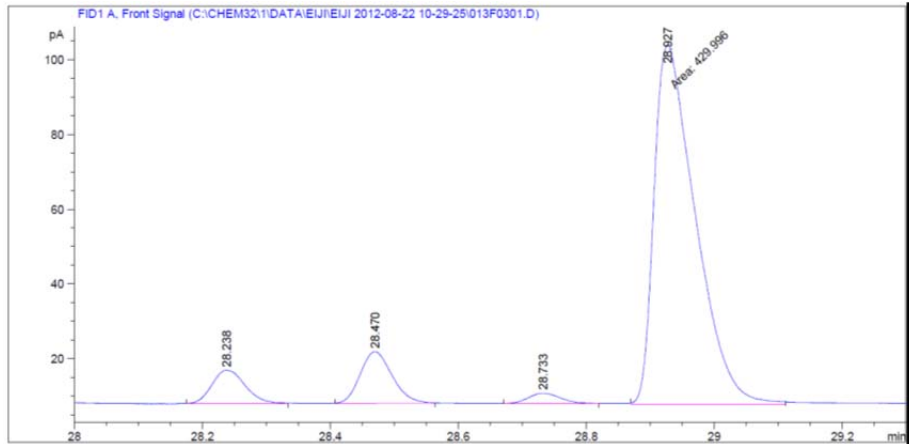

| Peak # | RetTime [min] | Type | Width [min] | Area [pA*s] | Height [pA] | Area %   |
|--------|---------------|------|-------------|-------------|-------------|----------|
| 1      | 28.238        | BB   | 0.0557      | 32.14819    | 8.91363     | 6.18251  |
| 2      | 28.470        | BB   | 0.0533      | 48.11090    | 13.85561    | 9.25235  |
| 3      | 28.733        | BB   | 0.0535      | 9.73064     | 2.78858     | 1.87133  |
| 4      | 28.927        | MM   | 0.0745      | 429.99585   | 96.17088    | 82.69380 |

**(3*R*,4*R*)-9-Fluoro-3-methylnon-1-en-4-ol (2b)**

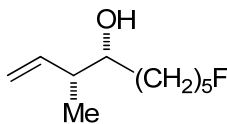

To a resealable pressure tube (13 x 100 mm) equipped with a magnetic stir bar was added RuH<sub>2</sub>(CO)(PPh<sub>3</sub>)<sub>3</sub> (19.3 mg, 0.021 mmol, 7 mol%), (*S*)-SEGPPOS (13.0 mg, 0.021 mmol, 7 mol%), TADDOL-phosphoric acid (29.3 mg, 0.042 mmol, 14 mol%). The tube was sealed with a rubber septum and purged with argon. Alcohol **1b** (37 μL, 0.30 mmol, 100 mol%) and acetone (0.30 mL, 1.0 M concentration with respect to alcohol) were added and the solution was cooled to -78 °C. Butadiene (0.10 mL, 1.20 mmol, 400 mol%) was quickly added and the rubber septum was quickly replaced with a screw cap. The mixture was heated at 95 °C (oil bath temperature) for 3 days, at which point the reaction mixture was allowed to cool to ambient temperature. The reaction mixture was concentrated *in vacuo* and purified by flash column chromatography (SiO<sub>2</sub>; hexanes : ethyl acetate = 10:1) to furnish the title compound (43.9 mg, 0.25 mmol, *syn:anti* = 4.8:1, 96% ee) as a colorless oil in 84 % yield.

**TLC (SiO<sub>2</sub>):** R<sub>f</sub> = 0.45 (hexanes:ethyl acetate = 10:1).

**<sup>1</sup>H NMR** (400 MHz, CDCl<sub>3</sub>): δ 5.83-5.74 (m, 1H), 5.14-5.06 (m, 2H), 4.50 (t, *J* = 6.2 Hz, 1H), 4.36 (t, *J* = 6.2 Hz, 1H), 3.49 (ddd, *J* = 8.6, 5.1, 3.3 Hz, 1H), 2.32-2.23 (m, 1H), 1.77-1.64 (m, 2H), 1.56-1.36 (m, 6H), 1.03 (d, *J* = 7.0 Hz, 1H).

**<sup>13</sup>C NMR** (100 MHz, CDCl<sub>3</sub>): δ 140.9, 115.4, 85.1 (d, *J* = 164.6 Hz), 74.5, 43.5, 33.8, 30.4 (*J* = 19.5 Hz), 25.7, 25.2 (*J* = 5.2 Hz), 14.0.

**<sup>19</sup>F NMR** (376 MHz, CDCl<sub>3</sub>): δ -218.0 to -218.4 (m).

**LRMS** (CI+) *m/z* 175 [M+H]<sup>+</sup>

**FTIR** (neat): 3413, 2934, 2860, 1459, 1390, 1243, 997, 912 cm<sup>-1</sup>.

**GC** Cyclosil-B: Initial temperature: 50 °C (5 min hold); 80°C (5 min hold), rate: 2 °C/min; 130 °C, rate: 1.5 °C/min) *t*<sub>minor</sub> = 48.3 min, *t*<sub>major</sub> = 48.5 min.

[α]<sub>D</sub><sup>25</sup> = 66.6° (c = 1.0, CHCl<sub>3</sub>).

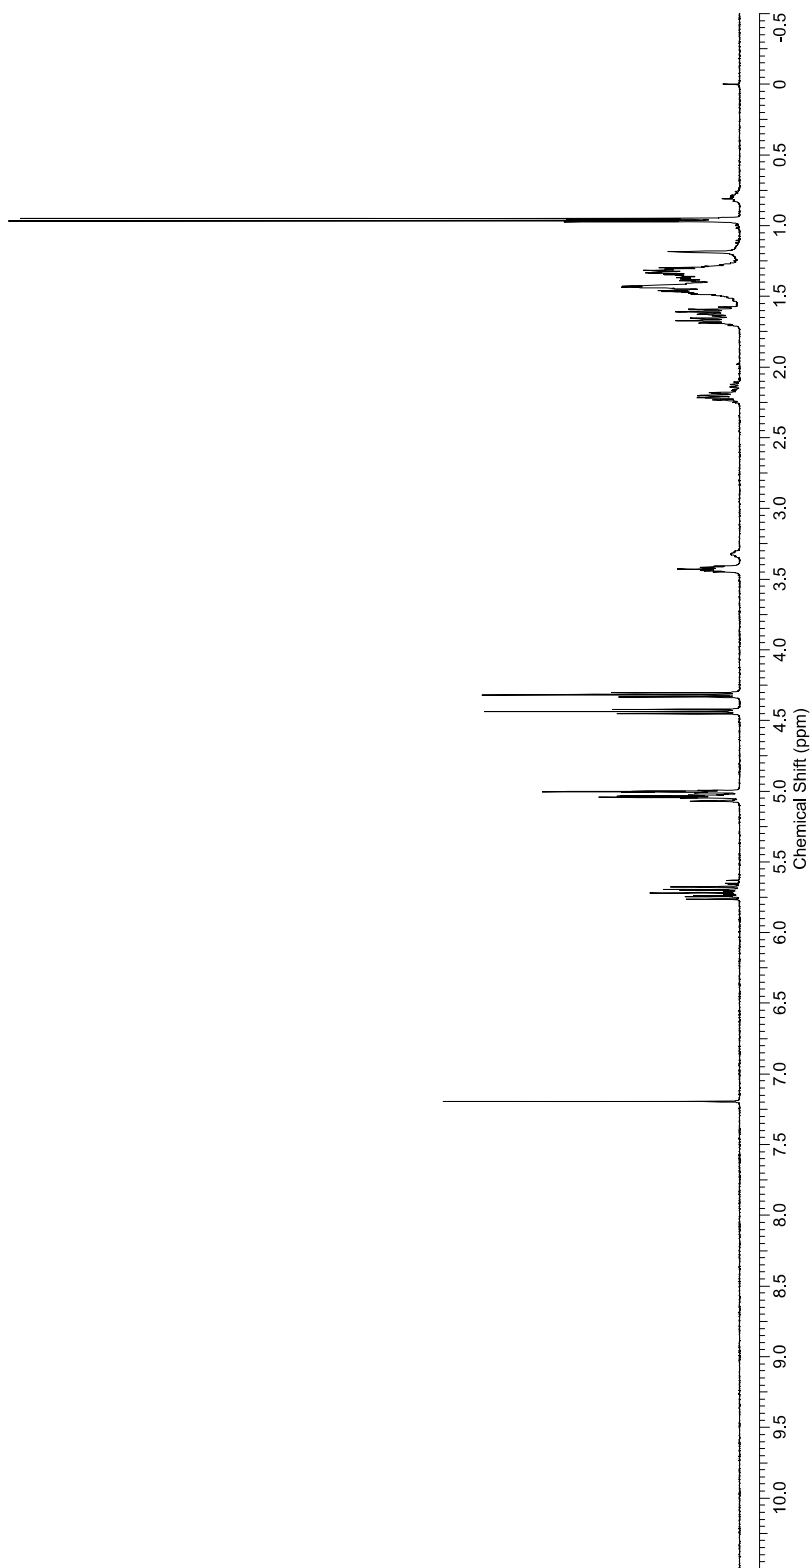



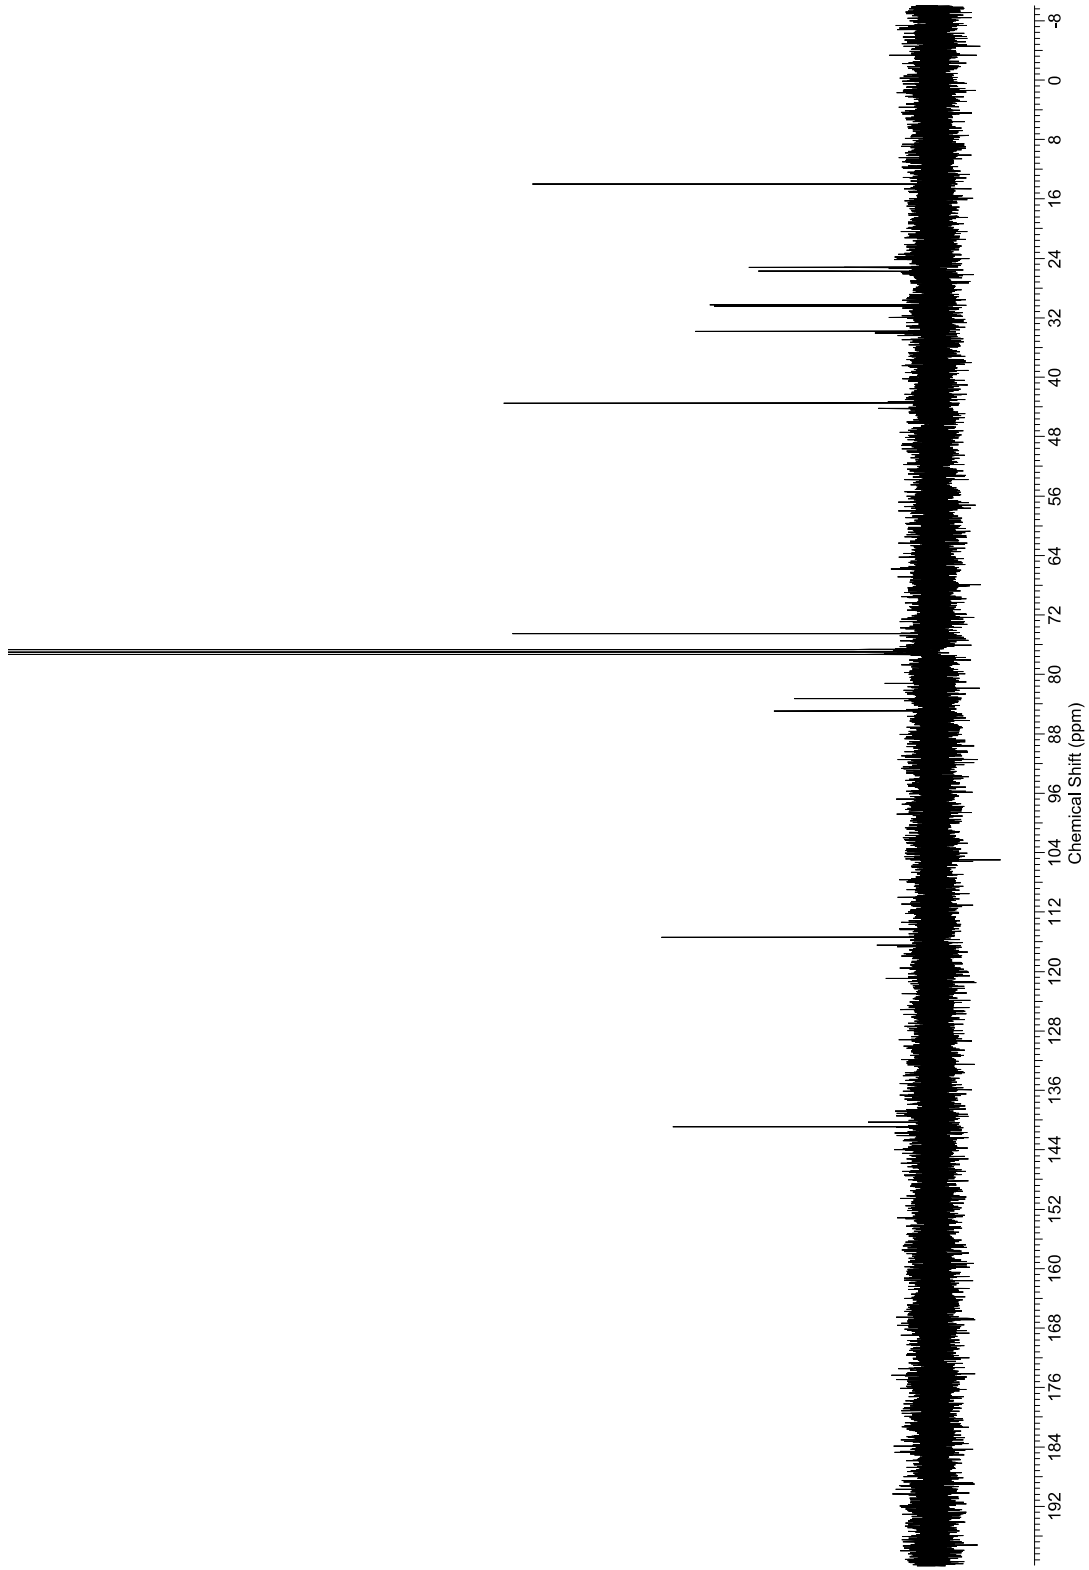

### GC (racemic)

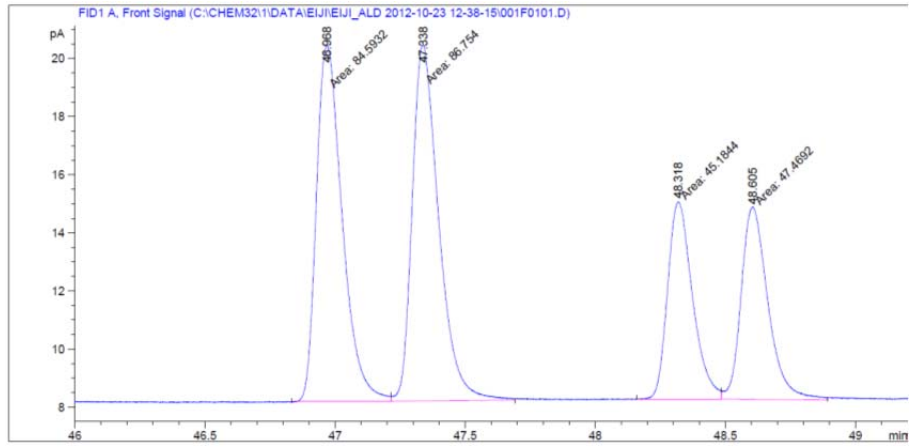

| Peak # | RetTime [min] | Type | Width [min] | Area [pA*s] | Height [pA] | Area %   |
|--------|---------------|------|-------------|-------------|-------------|----------|
| 1      | 46.968        | MM   | 0.1152      | 84.59325    | 12.24387    | 32.04278 |
| 2      | 47.338        | MM   | 0.1180      | 86.75404    | 12.25362    | 32.86126 |
| 3      | 48.318        | MM   | 0.1111      | 45.18442    | 6.77949     | 17.11525 |
| 4      | 48.605        | MM   | 0.1198      | 47.46924    | 6.60618     | 17.98071 |

### GC (chiral)

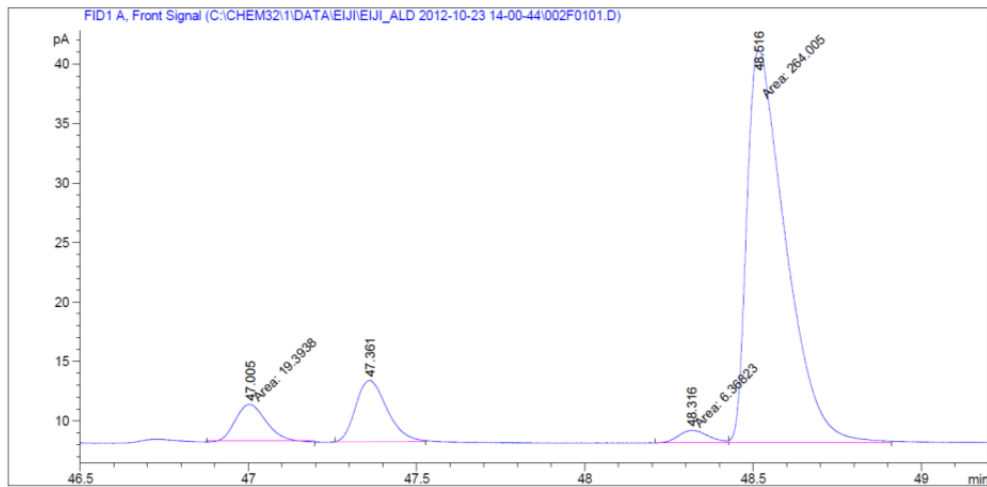

| Peak # | RetTime [min] | Type | Width [min] | Area [pA*s] | Height [pA] | Area %   |
|--------|---------------|------|-------------|-------------|-------------|----------|
| 1      | 47.005        | MM   | 0.1046      | 19.39376    | 3.08963     | 6.00519  |
| 2      | 47.361        | BB   | 0.1002      | 33.18232    | 5.13524     | 10.27476 |

| Peak # | RetTime [min] | Type | Width [min] | Area [pA*s] | Height [pA] | Area %   |
|--------|---------------|------|-------------|-------------|-------------|----------|
| 3      | 48.316        | MM   | 0.1018      | 6.36823     | 1.04287     | 1.97189  |
| 4      | 48.516        | MM   | 0.1334      | 264.00549   | 32.99131    | 81.74815 |

**(3R,4R)-3,6-dimethylhept-1-en-4-ol (2c)**

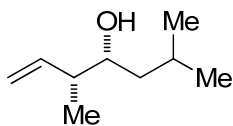

To a resealable pressure tube (13 x 100 mm) equipped with a magnetic stir bar was added RuH<sub>2</sub>(CO)(PPh<sub>3</sub>)<sub>3</sub> (13.8 mg, 0.015 mmol, 5 mol%), (*S*)-SEGPPOS (9.2 mg, 0.015 mmol, 5 mol%), TADDOL-phosphoric acid (20.9 mg, 0.03 mmol, 10 mol%). The tube was sealed with a rubber septum and purged with argon. Alcohol **1c** (33 μL, 0.30 mmol, 100 mol%) and acetone (0.30 mL, 1.0 M concentration with respect to alcohol) were added and the solution was cooled to -78 °C. Butadiene (0.10 mL, 1.20 mmol, 400 mol%) was quickly added and the rubber septum was quickly replaced with a screw cap. The mixture was heated at 95 °C (oil bath temperature) for 3 days, at which point the reaction mixture was allowed to cool to ambient temperature. The reaction mixture was concentrated *in vacuo* and purified by flash column chromatography (SiO<sub>2</sub>; hexanes:ethyl acetate = 8:1) to furnish the title compound (26.9 mg, 0.19 mmol, *syn:anti* = 4.6:1, 94% ee) as a colorless oil in 64% yield.

**TLC (SiO<sub>2</sub>):** R<sub>f</sub> = 0.4 (hexanes:ethyl acetate = 8:1).

**<sup>1</sup>H NMR** (400 MHz, CDCl<sub>3</sub>): δ 5.73 (ddd, *J* = 17.6, 10.0, 7.4 Hz, 1H), 5.07-4.99 (m, 2H), 3.62-3.57 (m, 1H), 2.28-2.23 (m, 1H), 1.83-1.77 (m, 1H), 1.45 (brs, 1H), 1.38-1.22 (m, 2H), 1.03 (d, *J* = 7.0 Hz, 3H), 0.94 (d, *J* = 6.8 Hz, 3H), 0.91 (d, *J* = 6.8 Hz, 3H)..

**<sup>13</sup>C NMR** (100 MHz, CDCl<sub>3</sub>): δ 141.0, 115.3, 72.5, 43.8, 43.1, 24.7, 23.7, 21.7, 14.0.

**LRMS** (CI+) *m/z* 143 [M+H]<sup>+</sup>

**FTIR** (neat): 3623, 2955, 2924, 1718, 1464, 1367, 966, 910, 694 cm<sup>-1</sup>.

**GC** Cyclosil-B: Initial temperature: 50 °C (5 min hold); 130 °C, rate: 3 °C/min) *t*<sub>minor</sub> = 19.1 min, *t*<sub>major</sub> = 19.5 min.

[α]<sub>D</sub><sup>25</sup> = 56.2° (c = 1.50, CH<sub>2</sub>Cl<sub>2</sub>). [α]<sub>D</sub><sup>25</sup> = 45.2° (c = 1.45, CH<sub>2</sub>Cl<sub>2</sub>) was reported for 96% ee of the (3*R*,4*R*) compound.<sup>5</sup>

*The spectroscopic properties of this compound were consistent with the data available in the literature.*<sup>5</sup>

<sup>5</sup> Hackman, B. M.; Lombardi, P. J.; Leighton, J. L. *Org. Lett.* **2004**, *6*, 4375.

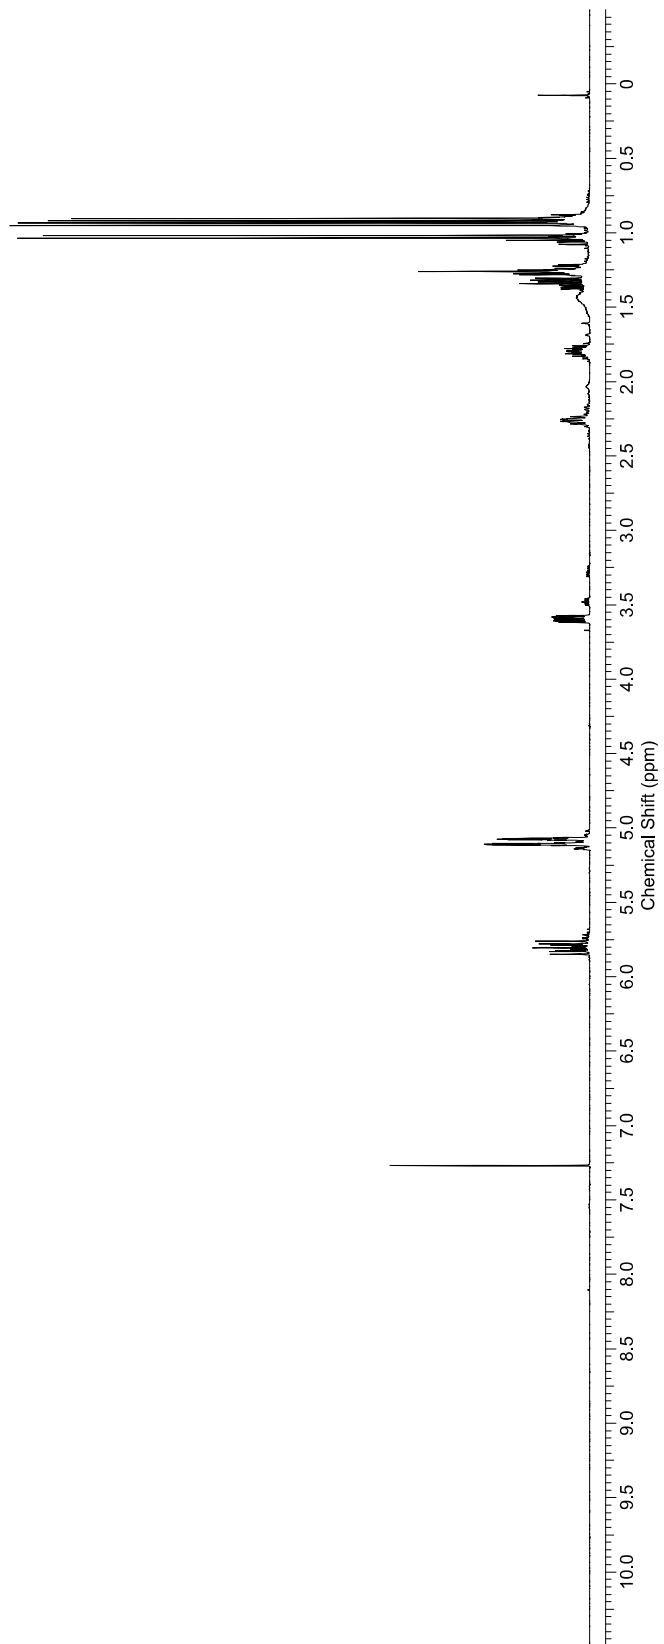

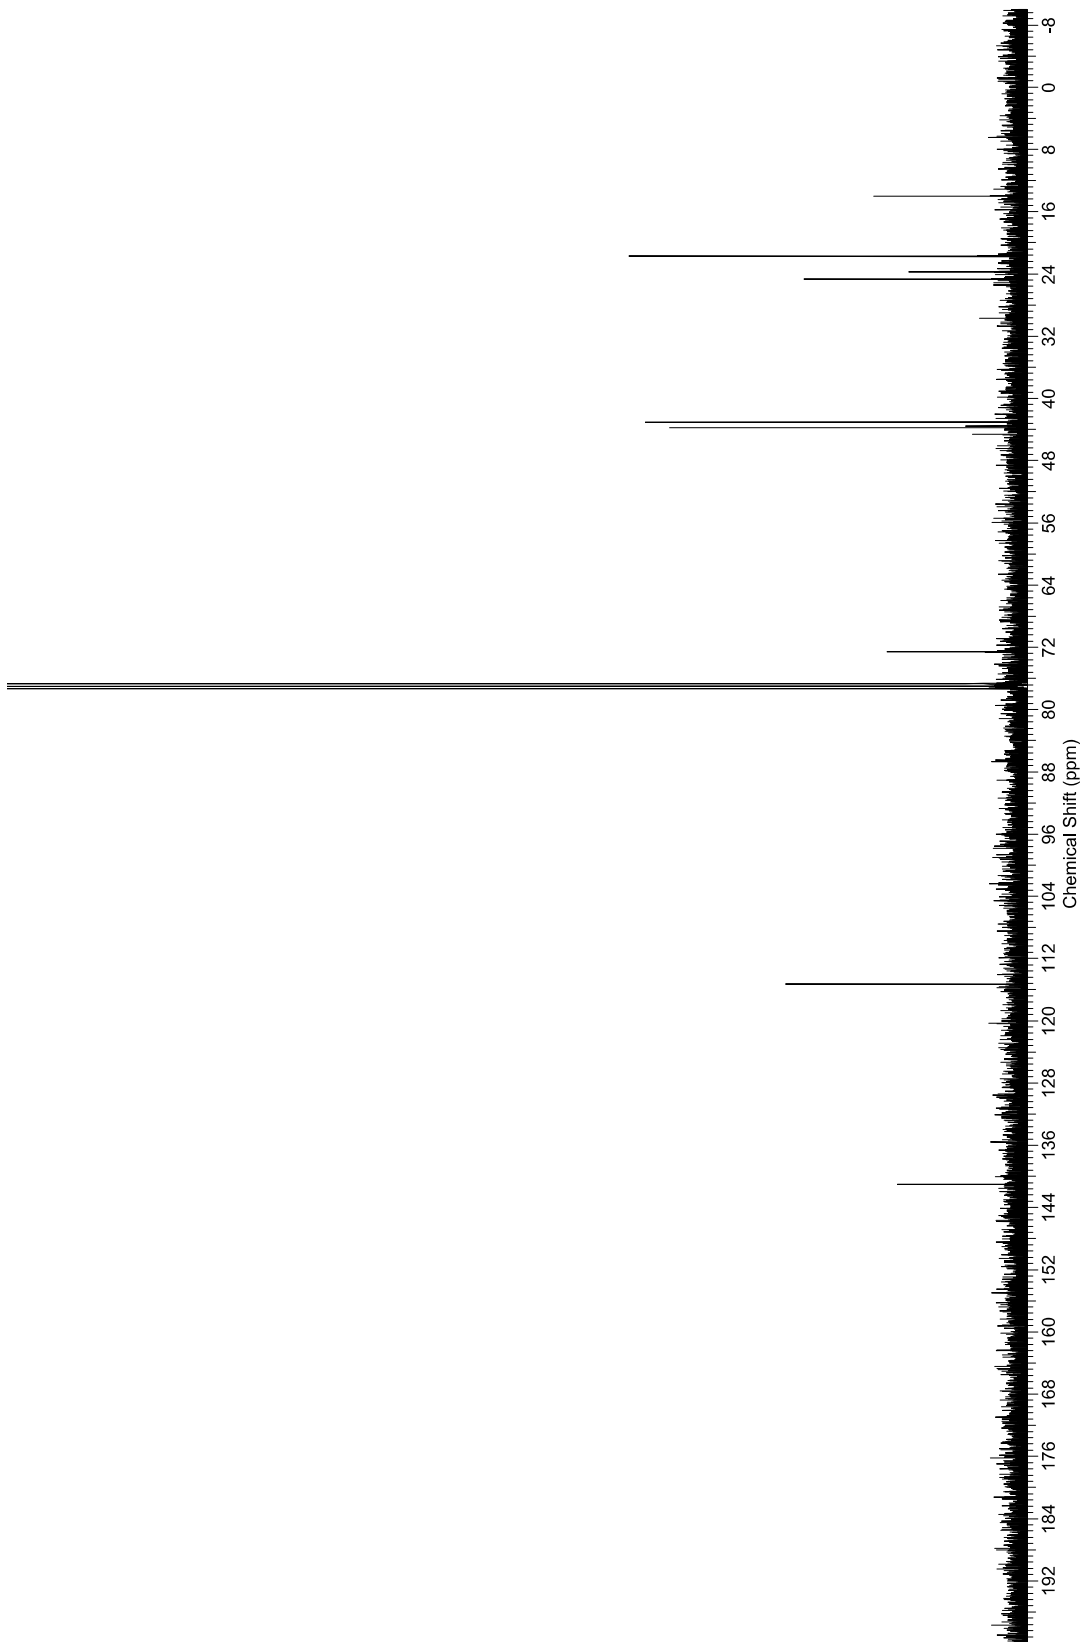

## GC (racemic)

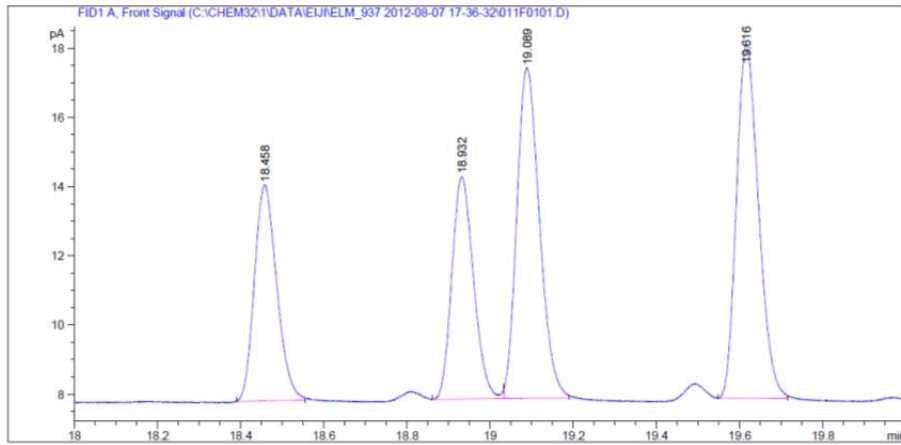

| Peak # | RetTime [min] | Type | Width [min] | Area [pA*s] | Height [pA] | Area %   |
|--------|---------------|------|-------------|-------------|-------------|----------|
| 1      | 18.458        | BB   | 0.0579      | 23.27678    | 6.24192     | 19.27926 |
| 2      | 18.932        | BB   | 0.0576      | 23.31637    | 6.42052     | 19.31206 |
| 3      | 19.089        | BB   | 0.0594      | 36.18595    | 9.55269     | 29.97143 |
| 4      | 19.616        | BB   | 0.0578      | 37.95570    | 10.20461    | 31.43725 |

## GC (chiral)

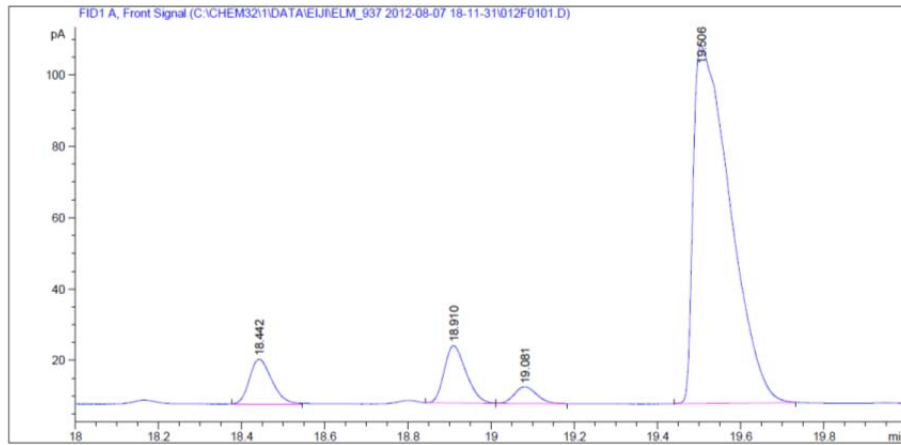

| Peak # | RetTime [min] | Type | Width [min] | Area [pA*s] | Height [pA] | Area %   |
|--------|---------------|------|-------------|-------------|-------------|----------|
| 1      | 18.442        | BB   | 0.0584      | 46.09629    | 12.45340    | 6.24982  |
| 2      | 18.910        | BB   | 0.0578      | 58.44566    | 16.02007    | 7.92417  |
| 3      | 19.081        | BB   | 0.0583      | 17.25777    | 4.67664     | 2.33984  |
| 4      | 19.506        | BB   | 0.0829      | 615.76196   | 100.21123   | 83.48616 |

**(3R,4R)-7,7,7-Trifluoro-3-methylhept-1-en-4-ol (2d)**

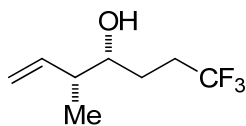

To a resealable pressure tube (13 x 100 mm) equipped with a magnetic stir bar was added RuH<sub>2</sub>(CO)(PPh<sub>3</sub>)<sub>3</sub> (19.3 mg, 0.021 mmol, 7 mol%), (S)-SEGPPOS (13.0 mg, 0.021 mmol, 7 mol%), TADDOL-phosphoric acid (29.3 mg, 0.042 mmol, 14 mol%). The tube was sealed with a rubber septum and purged with argon. Alcohol **1d** (32 μL, 0.30 mmol, 100 mol%) and acetone (0.30 mL, 1.0 M concentration with respect to alcohol) were added and the solution was cooled to -78 °C. Butadiene (0.10 mL, 1.20 mmol, 400 mol%) was quickly added and the rubber septum was quickly replaced with a screw cap. The mixture was heated at 95 °C (oil bath temperature) for 3 days, at which point the reaction mixture was allowed to cool to ambient temperature. The reaction mixture was concentrated *in vacuo* and purified by flash column chromatography (SiO<sub>2</sub>; hexanes:ethyl acetate = 10:1) to furnish the title compound (39 mg, 0.21 mmol, *syn:anti* = 4.3:1, 96% ee) as a colorless oil in 72% yield.

**TLC (SiO<sub>2</sub>):** R<sub>f</sub> = 0.4 (hexanes:ethyl acetate = 10:1).

**<sup>1</sup>H NMR** (400 MHz, CDCl<sub>3</sub>): δ 5.80-5.68 (m, 1H), 5.20-5.11 (m, 2H), 3.54-3.49 (m, 1H), 2.43-2.26 (m, 2H), 2.22-2.06 (m, 1H), 1.82-1.73 (m, 1H), 1.64-1.53 (m, 2H), 1.06 (d, *J* = 6.9 Hz, 3H).

**<sup>13</sup>C NMR** (100 MHz, CDCl<sub>3</sub>): δ 139.8, 127.4 (q, *J* = 276.0 Hz), 116.3, 73.4, 43.9, 30.7 (q, *J* = 29.2 Hz), 26.3 (q, *J* = 3.0 Hz), 14.5.

**<sup>19</sup>F NMR** (376 MHz, CDCl<sub>3</sub>): δ -66.37 (*J* = 10.9 Hz).

**LRMS** (Cl<sup>+</sup>) *m/z* 183 [M+H]<sup>+</sup>

**FTIR** (neat): 3373, 2964, 2358, 1455, 1383, 1225, 1138, 1032, 1005, 918, 800 cm<sup>-1</sup>.

**GC** (Cyclosil-B: Initial temperature: 50 °C (5 min hold); 130 °C, rate: 3 °C/min), *t*<sub>minor</sub> = 18.1 min, *t*<sub>major</sub> = 18.9 min.

[α]<sub>D</sub><sup>25</sup> = 20.1° (c = 1.0, CHCl<sub>3</sub>).

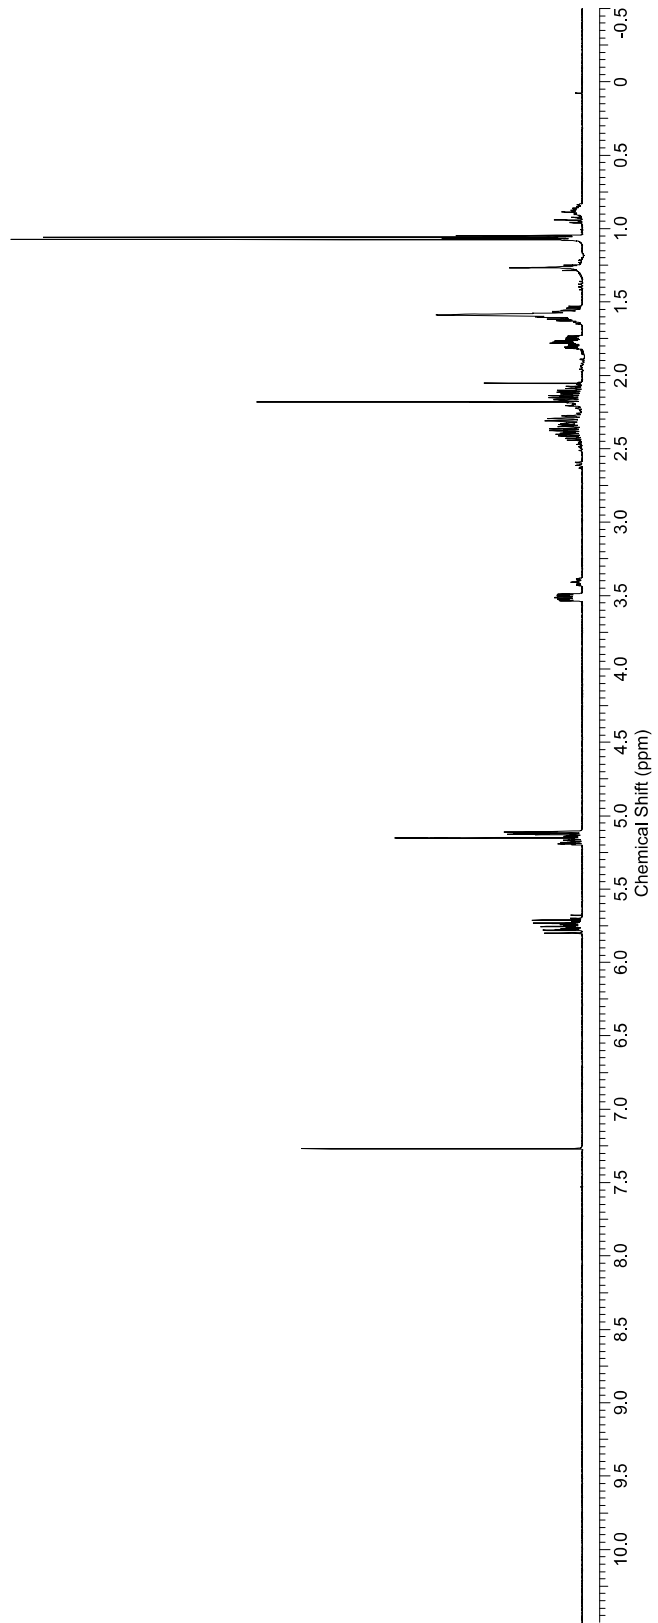





**GC (racemic)**

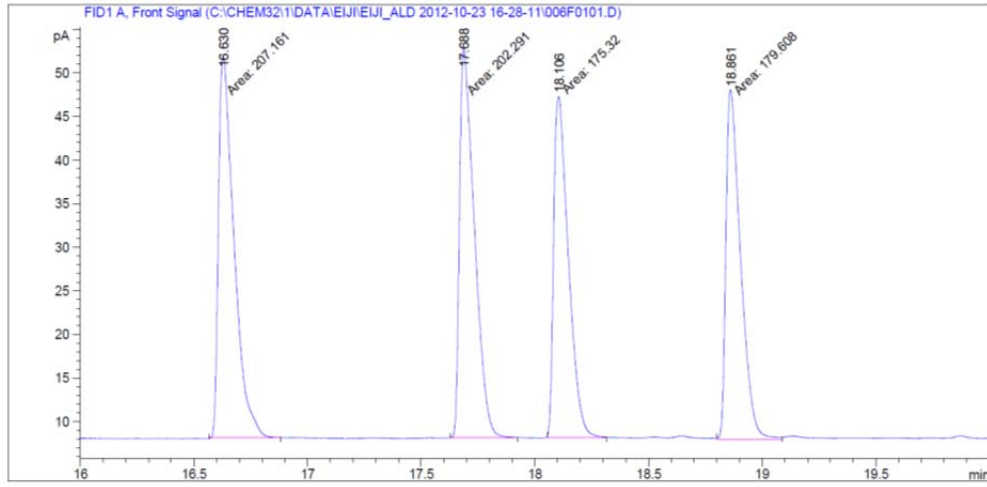

| Peak # | RetTime [min] | Type | Width [min] | Area [pA*s] | Height [pA] | Area %   |
|--------|---------------|------|-------------|-------------|-------------|----------|
| 1      | 16.630        | MM   | 0.0792      | 207.16109   | 43.59585    | 27.10185 |
| 2      | 17.688        | MM   | 0.0754      | 202.29076   | 44.74445    | 26.46469 |
| 3      | 18.106        | MM   | 0.0747      | 175.31981   | 39.09904    | 22.93621 |
| 4      | 18.861        | MM   | 0.0747      | 179.60822   | 40.08700    | 23.49725 |

**GC (chiral)**

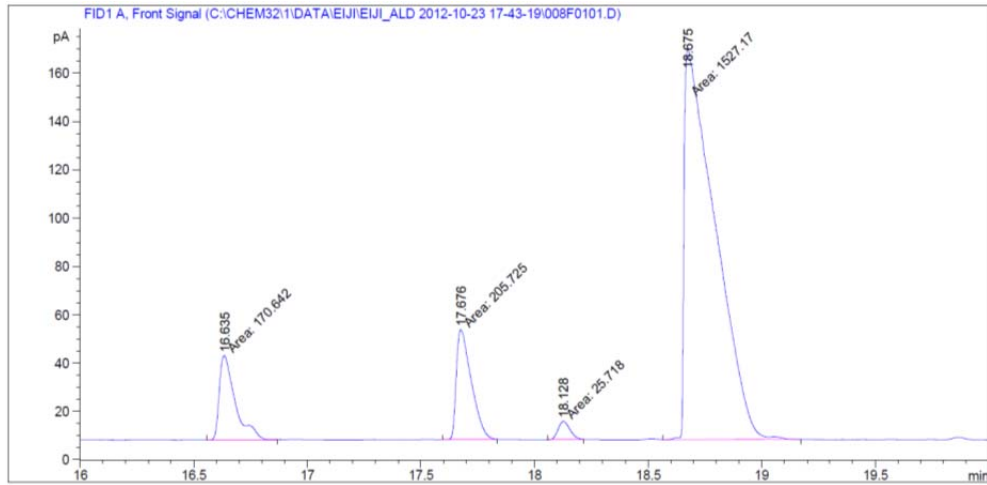

| Peak # | RetTime [min] | Type | Width [min] | Area [pA*s] | Height [pA] | Area %   |
|--------|---------------|------|-------------|-------------|-------------|----------|
| 1      | 16.635        | MM   | 0.0813      | 170.64178   | 34.98223    | 8.84494  |
| 2      | 17.676        | MM   | 0.0757      | 205.72536   | 45.31288    | 10.66344 |
| 3      | 18.128        | MM   | 0.0581      | 25.71798    | 7.37326     | 1.33305  |
| 4      | 18.675        | MM   | 0.1568      | 1527.17419  | 162.28458   | 79.15858 |

**(3*R*,4*R*,6*R*)-3,6,10-trimethylundeca-1,9-dien-4-ol (2e)**

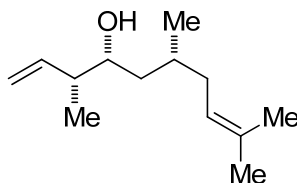

To a resealable pressure tube (13 x 100 mm) equipped with a magnetic stir bar was added RuH<sub>2</sub>(CO)(PPh<sub>3</sub>)<sub>3</sub> (13.8 mg, 0.015 mmol, 5 mol%), (*S*)-SEGPHOS (9.3 mg, 0.015 mmol, 5 mol%), TADDOL-phosphoric acid (20.9 mg, 0.03 mmol, 10 mol%). The tube was sealed with a rubber septum and purged with argon. Alcohol **1e** (41 μL, 0.30 mmol, 100 mol%) and acetone (0.30 mL, 1.0 M concentration with respect to alcohol) were added and the solution was cooled to -78 °C. Butadiene (0.10 mL, 1.20 mmol, 400 mol%) was quickly added and the rubber septum was quickly replaced with a screw cap. The mixture was heated at 95 °C (oil bath temperature) for 3 days, at which point the reaction mixture was allowed to cool to ambient temperature. The reaction mixture was concentrated *in vacuo* and purified by flash column chromatography (SiO<sub>2</sub>; hexanes:ethyl acetate = 8:1) to furnish the title compound (52.3 mg, 0.27 mmol, *syn:anti* = 4.6:1, 95% ee) as a colorless oil in 89% yield.

**TLC (SiO<sub>2</sub>):** R<sub>f</sub> = 0.45 (hexanes:ethyl acetate = 8:1).

**<sup>1</sup>H NMR** (400 MHz, CDCl<sub>3</sub>): δ 5.81 (ddd, *J* = 17.6, 9.8, 7.2 Hz, 1H), 5.13-5.06 (m, 3H), 3.65-3.59 (m, 1H), 2.30-2.21 (m, 1H), 2.07-1.88 (m, 2H), 1.68 (s, 3H), 1.60 (s, 3H), 1.59 (brs, 1H), 1.49-1.38 (m, 2H), 1.35-1.05 (m, 3H), 1.01 (d, *J* = 6.9 Hz, 3H), 0.93 (d, *J* = 6.7 Hz, 3H).

**<sup>13</sup>C NMR** (100 MHz, CDCl<sub>3</sub>): δ 141.13, 131.24, 124.8, 115.3, 72.5, 43.4, 41.4, 36.3, 29.4, 25.7, 25.3, 20.5, 17.6, 13.6.

**LRMS** (CI+) *m/z* 211 [M+H]<sup>+</sup>

**FTIR** (neat): 3358, 2963, 2924, 1639, 1455, 1376, 1091, 996, 910, 734 cm<sup>-1</sup>.

**GC** (GC Cyclosil-B: Initial temperature: 50 °C (5 min hold); 100 °C (5 min hold), rate: 1 °C/min; 150 °C, rate 0.5 °C/min): *t*<sub>minor</sub> = 89.4 min, *t*<sub>major</sub> = 89.8 min.

**[α]<sub>D</sub><sup>25</sup>** = -38.33° (*c* = 1.0, CHCl<sub>3</sub>)

*The spectroscopic properties of this compound were consistent with the data available in the literature.*<sup>6</sup>

<sup>6</sup> Millan, A., Campana, A.G., Bazdi, B., Miguel, D., Alvarez de Cienfuegos, L., Cuerva, J.M., Echavarren, A.M. *Chem. Eur. J.* **2011**, *17*, 3985.

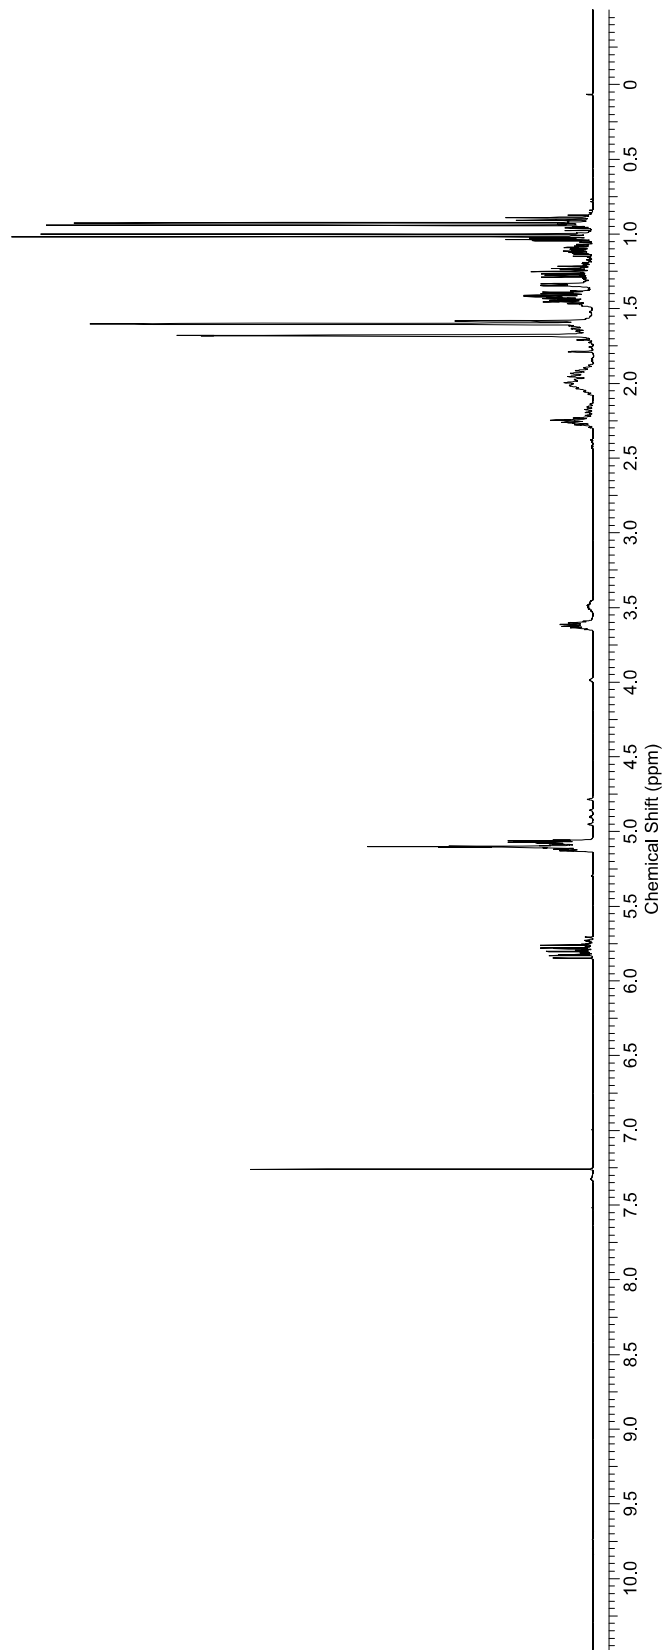

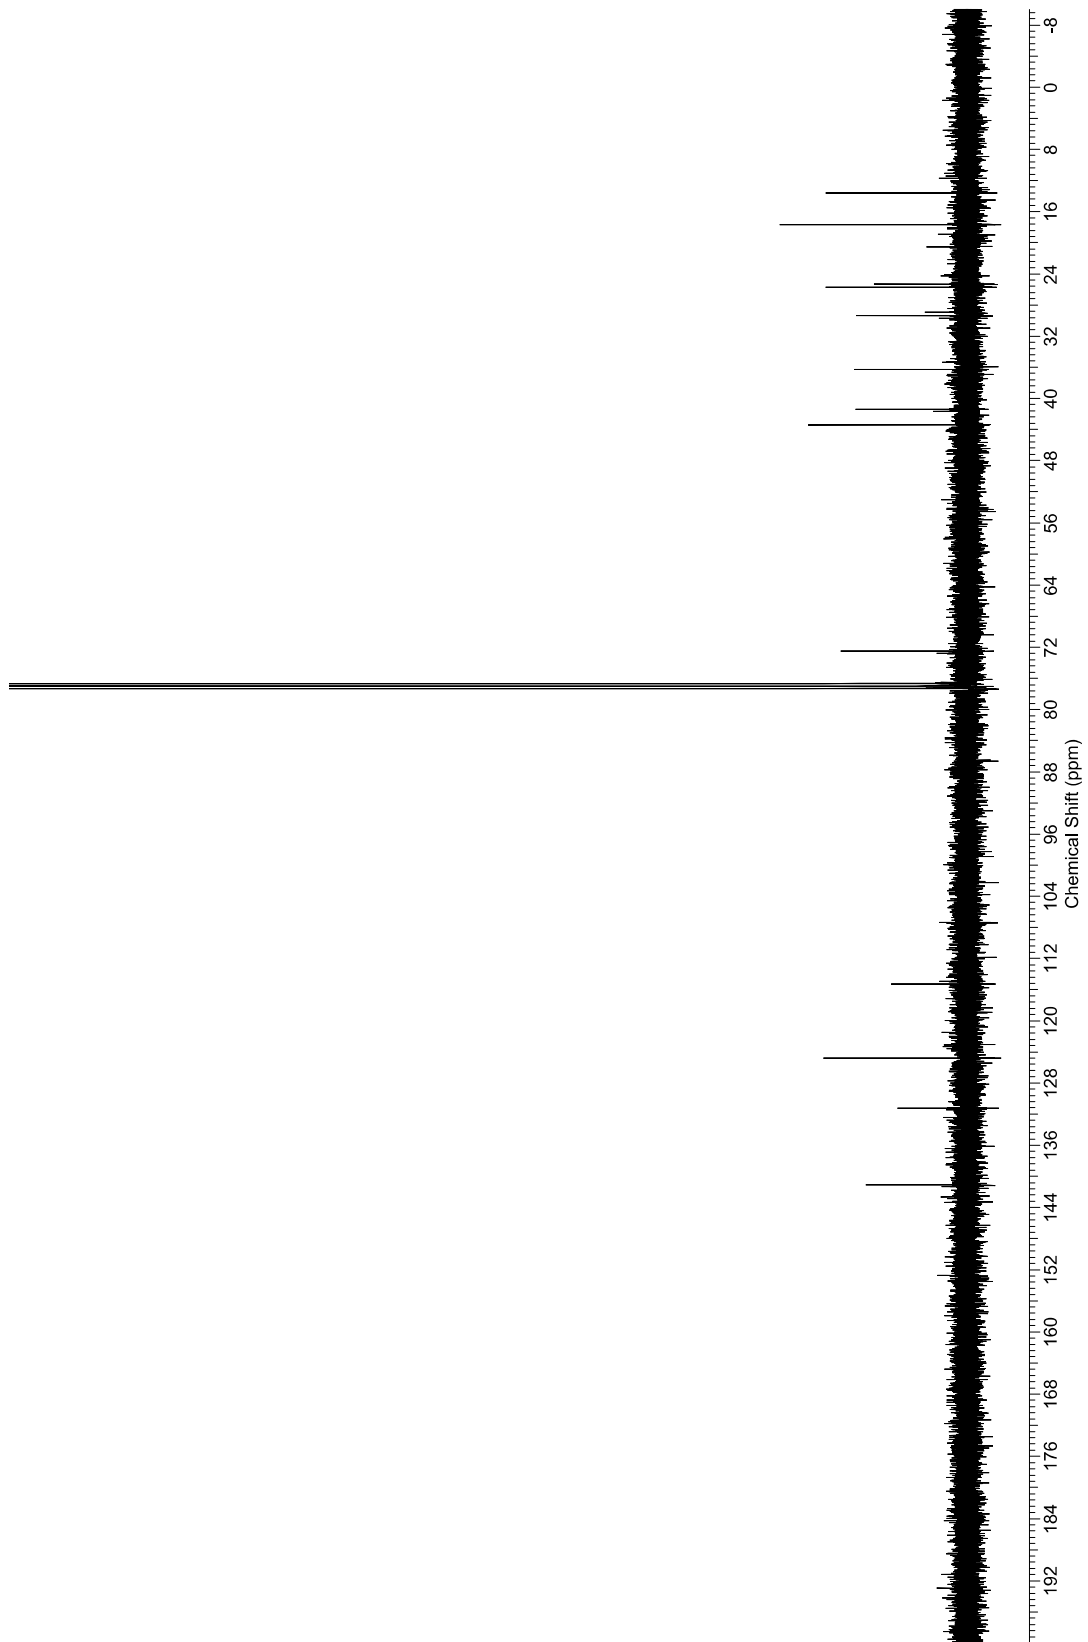

## GC (racemic)

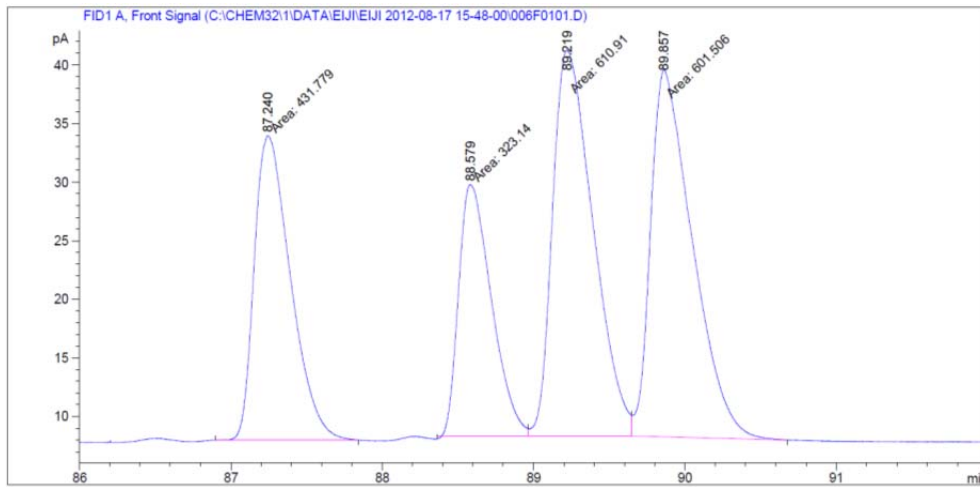

| Peak # | RetTime [min] | Type | Width [min] | Area [pA*s] | Height [pA] | Area %   |
|--------|---------------|------|-------------|-------------|-------------|----------|
| 1      | 87.240        | MM   | 0.2770      | 431.77914   | 25.97774    | 21.94741 |
| 2      | 88.579        | MM   | 0.2510      | 323.14011   | 21.45309    | 16.42527 |
| 3      | 89.219        | MM   | 0.3093      | 610.90973   | 32.91447    | 31.05265 |
| 4      | 89.857        | MM   | 0.3196      | 601.50623   | 31.36536    | 30.57467 |

## GC (chiral)

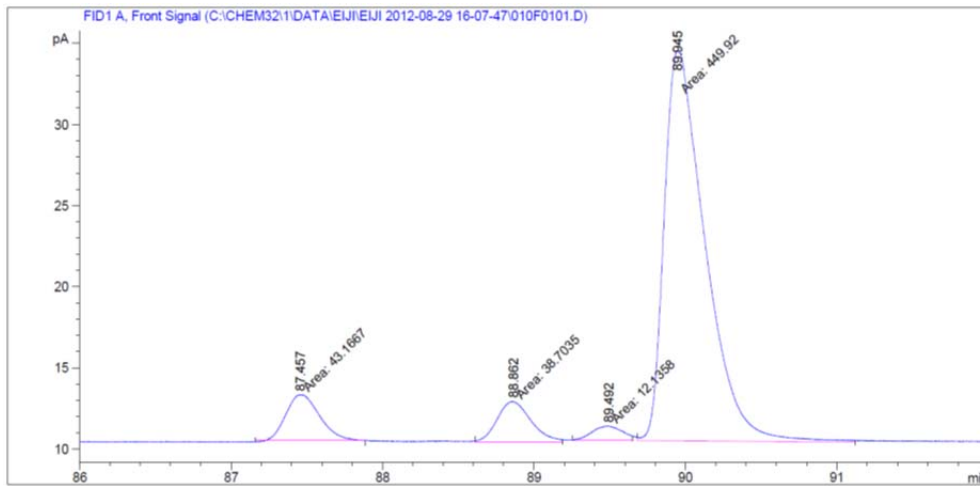

| Peak # | RetTime [min] | Type | Width [min] | Area [pA*s] | Height [pA] | Area %   |
|--------|---------------|------|-------------|-------------|-------------|----------|
| 1      | 87.457        | MM   | 0.2560      | 43.16674    | 2.81008     | 7.93615  |
| 2      | 88.862        | MM   | 0.2582      | 38.70352    | 2.49848     | 7.11559  |
| 3      | 89.482        | MM   | 0.2313      | 12.13580    | 8.74436e-1  | 2.23115  |
| 4      | 89.945        | MM   | 0.3118      | 449.91974   | 24.05206    | 82.71712 |

**(2R,3R)-3-methyl-1-phenylpent-4-en-2-ol (2f)**

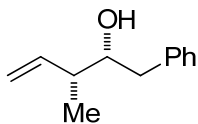

To a resealable pressure tube (13 x 100 mm) equipped with a magnetic stir bar was added  $\text{RuH}_2(\text{CO})(\text{PPh}_3)_3$  (13.8 mg, 0.015 mmol, 5 mol%), (*S*)-SEGPHOS (9.3 mg, 0.015 mmol, 5 mol%), TADDOL-phosphoric acid (20.9 mg, 0.03 mmol, 10 mol%). The tube was sealed with a rubber septum and purged with argon. Alcohol **1f** (36  $\mu\text{L}$ , 0.30 mmol, 100 mol%) and acetone (0.30 mL, 1.0 M concentration with respect to alcohol) were added and the solution was cooled to  $-78\text{ }^\circ\text{C}$ . Butadiene (0.10 mL, 1.20 mmol, 400 mol%) was quickly added and the rubber septum was quickly replaced with a screw cap. The mixture was heated at  $95\text{ }^\circ\text{C}$  (oil bath temperature) for 3 days, at which point the reaction mixture was allowed to cool to ambient temperature. The reaction mixture was concentrated *in vacuo* and purified by flash column chromatography ( $\text{SiO}_2$ ; hexanes:ethyl acetate = 8:1) to furnish the title compound (45.0 mg, 0.26 mmol, *syn:anti* = 3.8:1, 91% ee) as a colorless oil in 85% yield.

**TLC ( $\text{SiO}_2$ ):**  $R_f = 0.5$  (hexanes:ethyl acetate = 8:1).

**$^1\text{H NMR}$**  (400 MHz,  $\text{CDCl}_3$ ):  $\delta$  7.33-7.30 (m, 2H), 7.25-7.21 (m, 3H), 5.92-5.82 (m, 1H), 5.17-5.09 (m, 2H), 3.74-3.67 (m, 1H), 2.91-2.85 (m, 1H), 2.66-2.58 (m, 1H), 2.34-2.27 (m, 1H), 1.56 (brs, 1H), 1.12 (d,  $J = 6.9\text{ Hz}$ , 3H).

**$^{13}\text{C NMR}$**  (100 MHz,  $\text{CDCl}_3$ ):  $\delta$  140.9, 129.3, 128.6, 128.5, 126.4, 115.4, 75.7, 43.1, 40.8, 14.5.

**LRMS** (CI+)  $m/z$  177 [ $\text{M}+\text{H}$ ] $^+$

**FTIR** (neat): 3432, 3063, 2964, 1637, 1497, 1453, 1030, 998, 912, 699  $\text{cm}^{-1}$ .

**HPLC** (Chiralcel OD-H/OD-H/OD-H column, hexanes:*i*-PrOH = 98.5:1.5, 0.4 mL/min, 210 nm).  $t_{\text{minor}} = 135.3\text{ min}$ ,  $t_{\text{major}} = 81.3\text{ min}$ .

$[\alpha]_D^{25} = 58.3^\circ$  ( $c = 1.0$ ,  $\text{CHCl}_3$ ).

*The spectroscopic properties of this compound were consistent with the data available in the literature.*<sup>7</sup>

<sup>7</sup> Canterbury, D.P., Mcalizio, G.C. *J. Am. Chem. Soc.* **2010**, *132*, 7602.

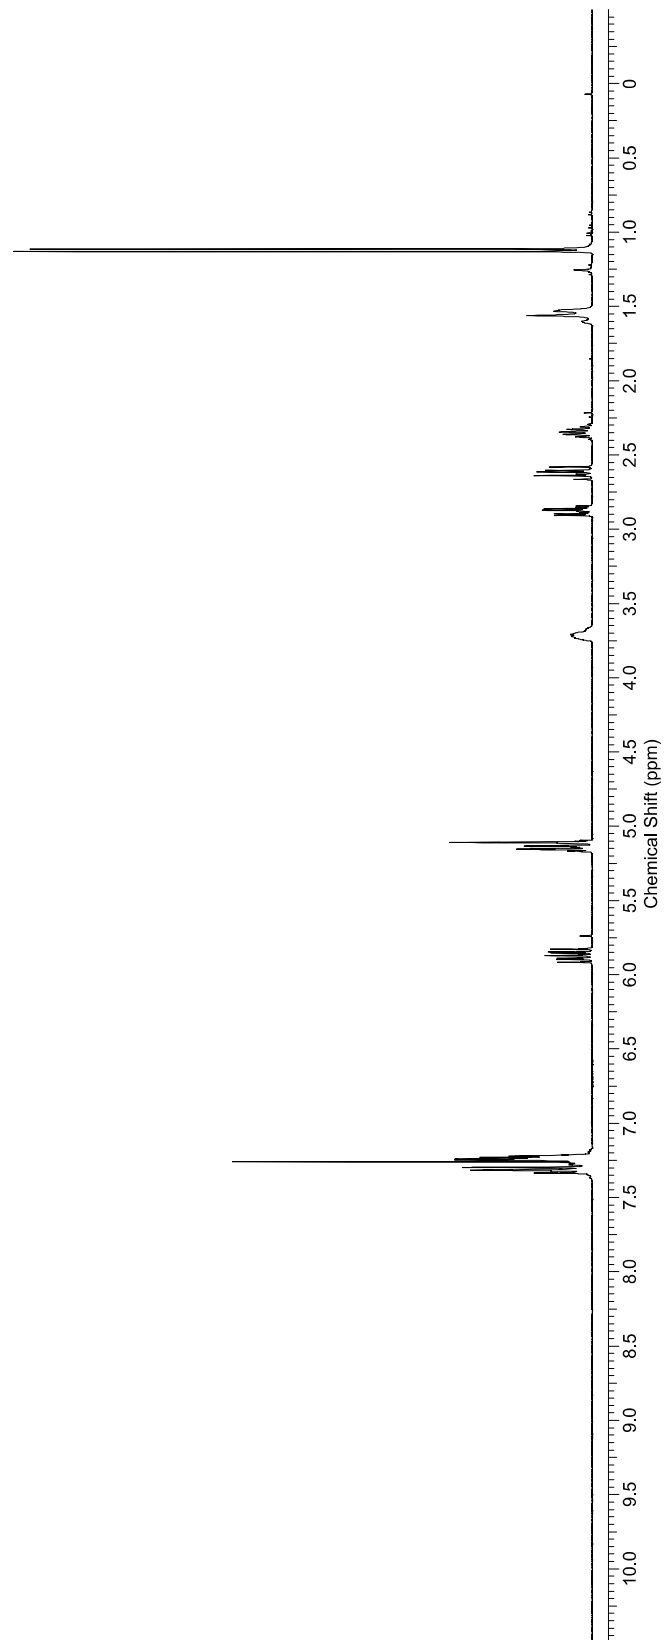



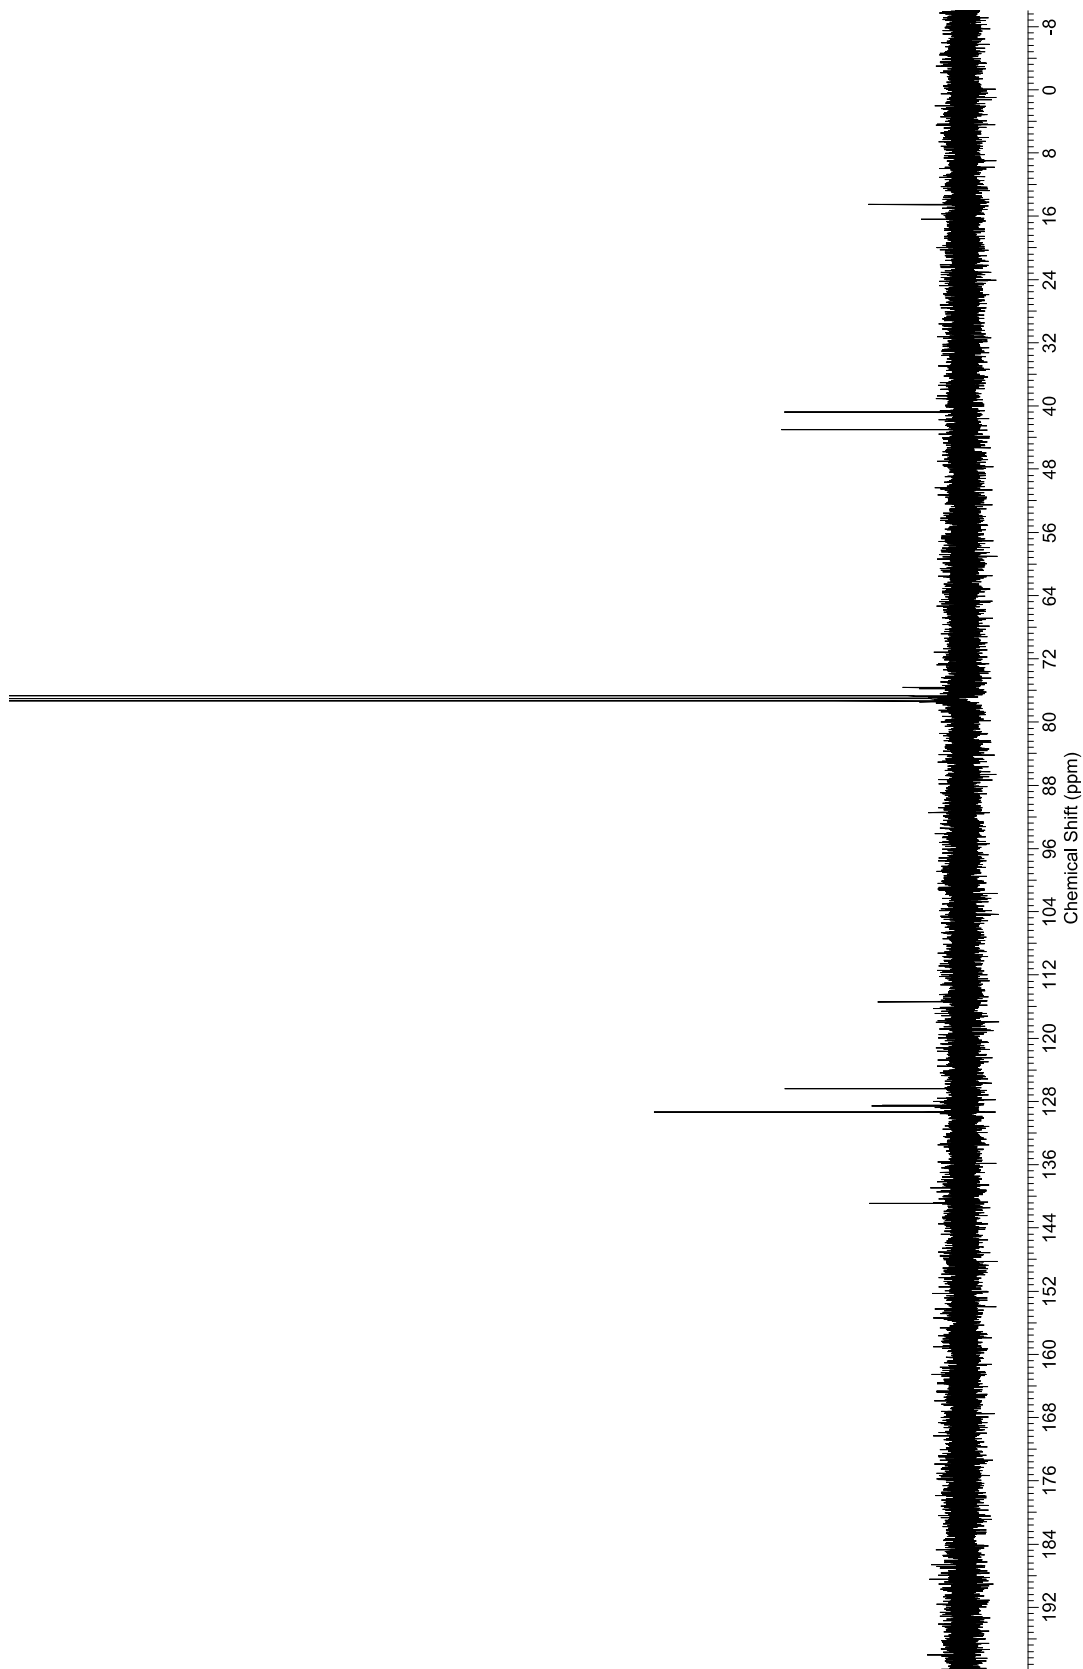

## HPLC (racemic)

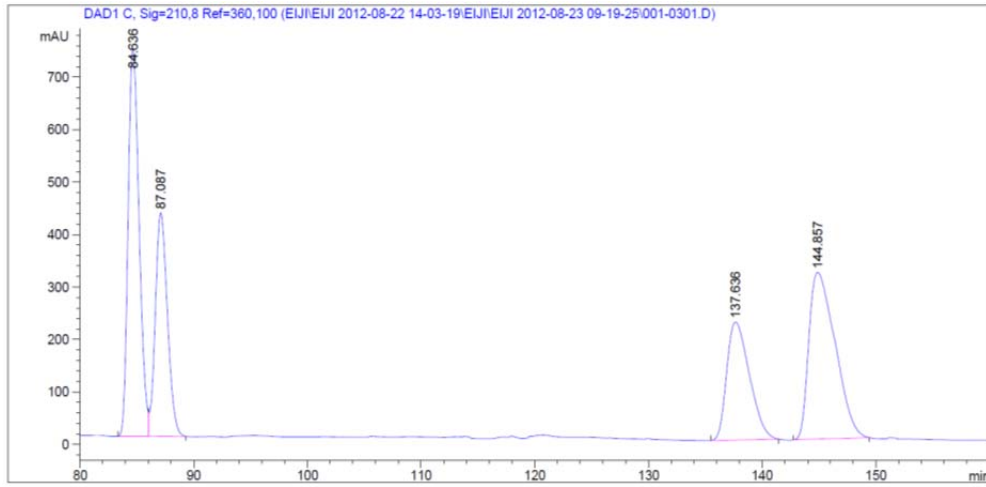

| Peak # | RetTime [min] | Type | Width [min] | Area [mAU*s] | Height [mAU] | Area %  |
|--------|---------------|------|-------------|--------------|--------------|---------|
| 1      | 84.636        | BV   | 1.0331      | 4.99310e4    | 740.07764    | 30.4366 |
| 2      | 87.087        | VB   | 1.1297      | 3.15808e4    | 426.56256    | 19.2508 |
| 3      | 137.636       | BB   | 1.9088      | 3.13079e4    | 225.36082    | 19.0844 |
| 4      | 144.857       | BB   | 2.1288      | 5.12296e4    | 318.45074    | 31.2282 |

## HPLC (chiral)

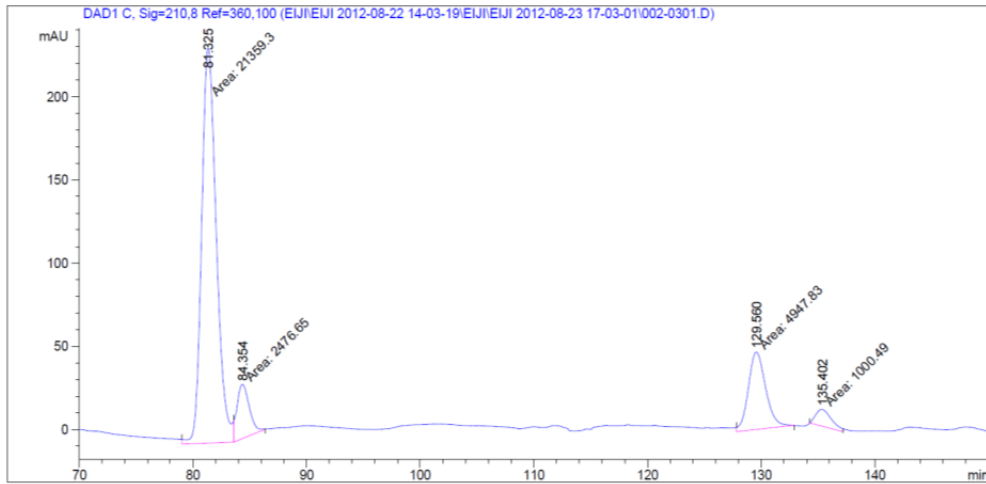

| Peak # | RetTime [min] | Type | Width [min] | Area [mAU*s] | Height [mAU] | Area %  |
|--------|---------------|------|-------------|--------------|--------------|---------|
| 1      | 81.325        | MM   | 1.4988      | 2.13593e4    | 237.52106    | 71.7133 |
| 2      | 84.354        | MM   | 1.2600      | 2476.65283   | 32.76032     | 8.3153  |
| 3      | 129.560       | MM   | 1.7695      | 4947.82715   | 46.60183     | 16.6122 |
| 4      | 135.402       | MM   | 1.6332      | 1000.48926   | 10.20993     | 3.3591  |

**(3R,4R)-4-methyl-1-phenylhex-5-en-3-ol (2g)**

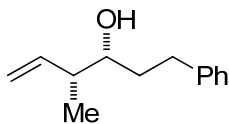

To a resealable pressure tube (13 x 100 mm) equipped with a magnetic stir bar was added RuH<sub>2</sub>(CO)(PPh<sub>3</sub>)<sub>3</sub> (13.8 mg, 0.015 mmol, 5 mol%), (*S*)-SEGPHOS (9.3 mg, 0.015 mmol, 5 mol%), TADDOL-phosphoric acid (20.9 mg, 0.03 mmol, 10 mol%). The tube was sealed with a rubber septum and purged with argon. Alcohol **1g** (41 μL, 0.30 mmol, 100 mol%) and acetone (0.30 mL, 1.0 M concentration with respect to alcohol) were added and the solution was cooled to -78 °C. Butadiene (0.10 mL, 1.20 mmol, 400 mol%) was quickly added and the rubber septum was quickly replaced with a screw cap. The mixture was heated at 95 °C (oil bath temperature) for 3 days, at which point the reaction mixture was allowed to cool to ambient temperature. The reaction mixture was concentrated *in vacuo* and purified by flash column chromatography (SiO<sub>2</sub>; hexanes:ethyl acetate = 8:1) to furnish the title compound (44.3 mg, 0.23 mmol, *syn:anti* = 5.5:1, 95% ee) as a colorless oil in 78% yield.

**TLC (SiO<sub>2</sub>):** R<sub>f</sub> = 0.4 (hexanes:ethyl acetate = 8:1).

**<sup>1</sup>H NMR** (400 MHz, CDCl<sub>3</sub>): δ 7.31-7.27 (m, 2H), 7.22-7.17 (m, 3H), 5.77 (ddd, *J* = 17.4, 9.8, 7.4 Hz, 1H), 5.12-5.07 (m, 2H), 3.53 (ddd, *J* = 9.2, 5.1, 3.1 Hz, 1H), 2.86 (ddd, *J* = 13.7, 10.0, 5.1 Hz, 1H), 2.65 (ddd, *J* = 13.7, 9.8, 6.8 Hz, 1H), 2.34-2.27 (m, 1H), 1.82 (dddd, *J* = 13.9, 10.0, 6.8, 3.1 Hz, 1H), 1.69 (ddd, *J* = 13.9, 9.8, 5.1 Hz, 1H), 1.69 (d, *J* = 6.9 Hz, 1H).

**<sup>13</sup>C NMR** (100 MHz, CDCl<sub>3</sub>): δ 142.3, 140.7, 128.5, 128.4, 125.8, 115.6, 74.0, 43.6, 35.8, 32.5, 14.2.

**LRMS** (Cl<sup>+</sup>) *m/z* 191 [M+H]<sup>+</sup>

**FTIR** (neat): 3414, 2928, 2869, 1737, 1454, 1373, 1216, 1032, 938, 699 cm<sup>-1</sup>.

**HPLC** (Chiralcel OD-H column, hexanes:*i*-PrOH = 97:3, 0.7 mL/min, 210 nm), *t*<sub>minor</sub> = 15.5 min, *t*<sub>major</sub> = 27.6 min.

[α]<sub>D</sub><sup>25</sup> = 33.0° (*c* = 1.0, CHCl<sub>3</sub>) reported for 96% ee of the (3*S*,4*S*) compound [α]<sub>D</sub><sup>25</sup> = -32.5° (*c* = 0.8, CHCl<sub>3</sub>).<sup>8</sup>

*The spectroscopic properties of this compound were consistent with the data available in the literature.*<sup>8</sup>

<sup>8</sup> Lachance, H.; Lu, Xiaosong.; Gravel, M.; Hall, G. D. *J. Am. Chem. Soc.* **2003**, *125*, 10160.

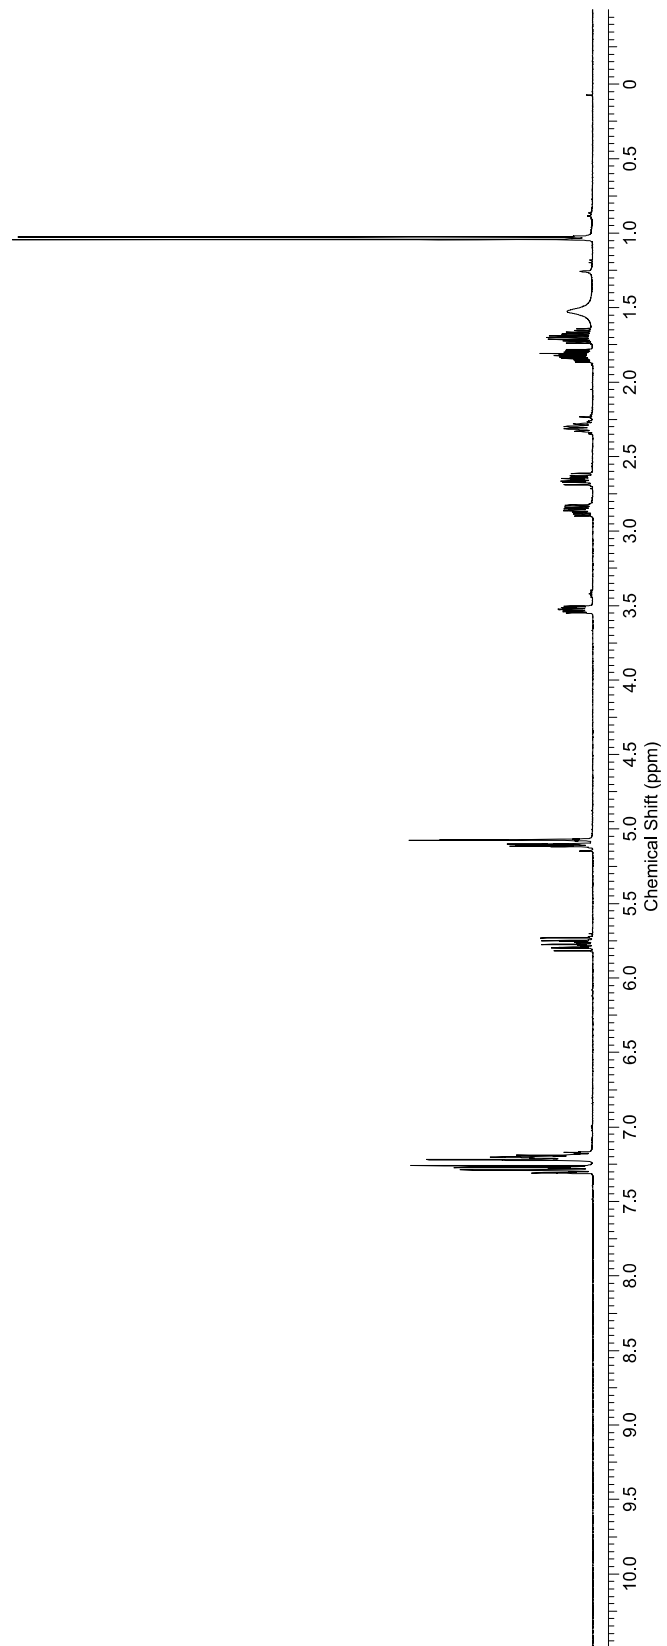

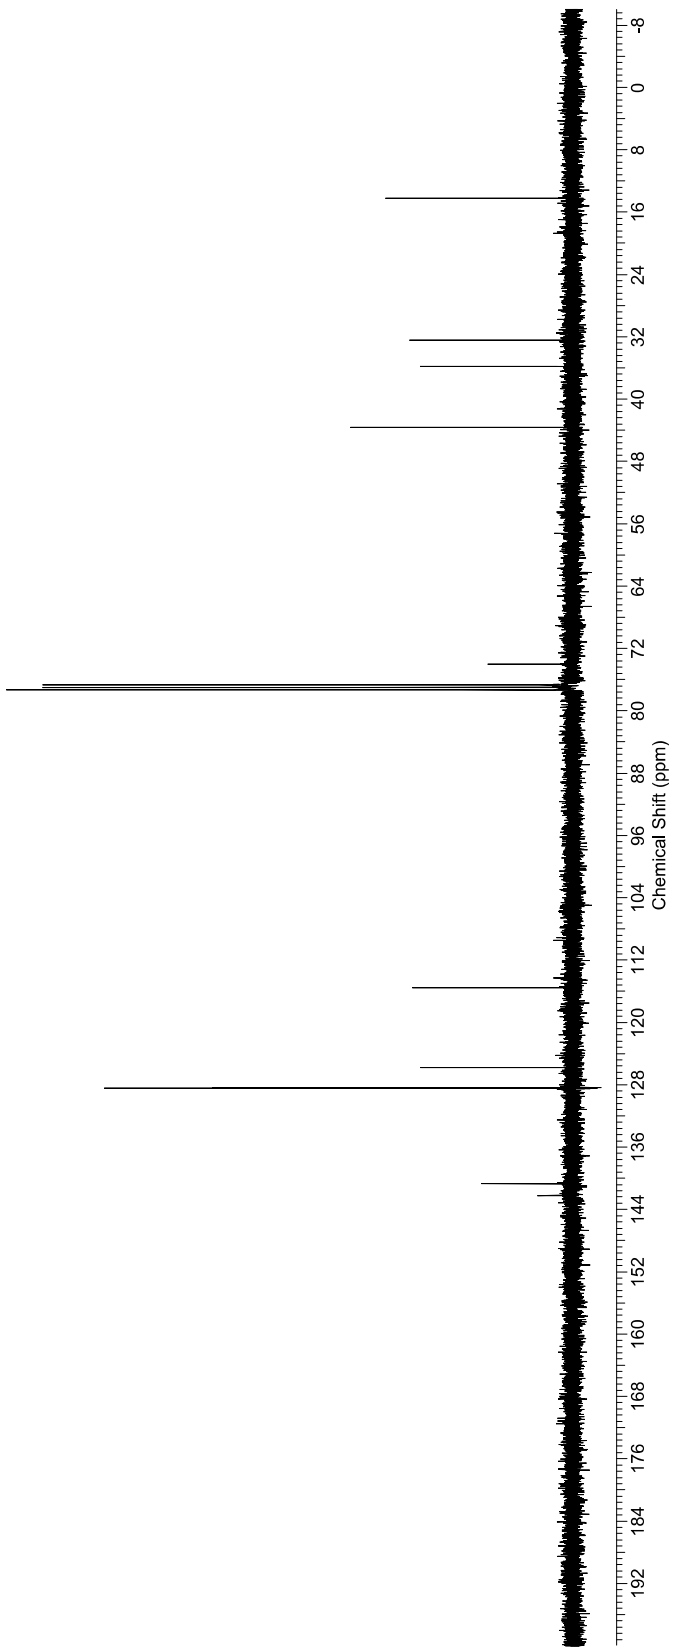

### HPLC (*racemic*)

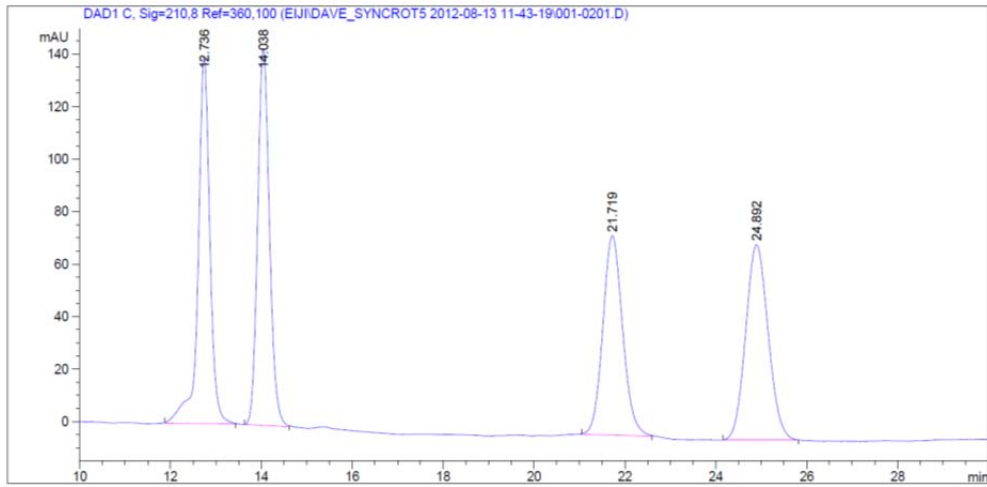

| Peak # | RetTime [min] | Type | Width [min] | Area [mAU*s] | Height [mAU] | Area %  |
|--------|---------------|------|-------------|--------------|--------------|---------|
| 1      | 12.736        | BB   | 0.2711      | 2524.78613   | 139.55258    | 25.2787 |
| 2      | 14.038        | BB   | 0.2783      | 2585.83911   | 143.46355    | 25.8900 |
| 3      | 21.719        | BB   | 0.4677      | 2304.21509   | 76.01109     | 23.0703 |
| 4      | 24.892        | BB   | 0.5410      | 2572.96533   | 74.48742     | 25.7611 |

### HPLC (*chiral*)

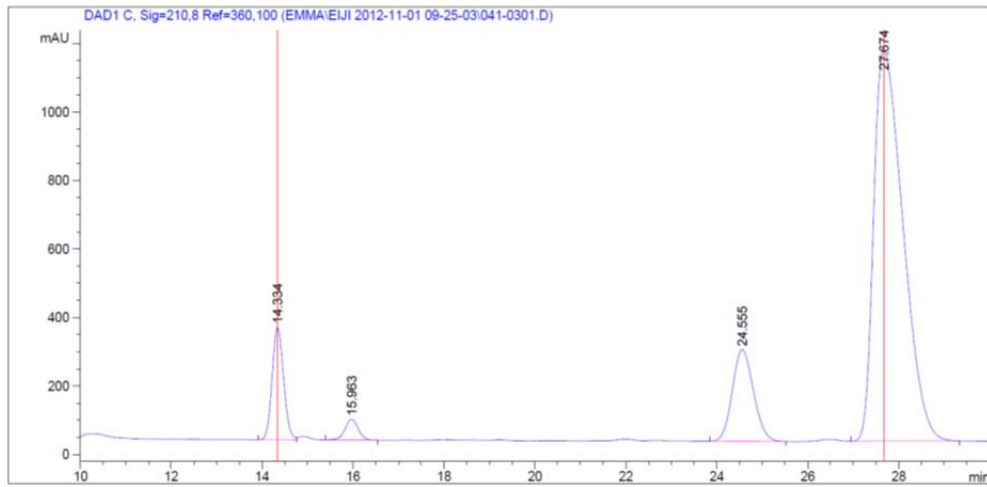

| Peak # | RetTime [min] | Type | Width [min] | Area [mAU*s] | Height [mAU] | Area %  |
|--------|---------------|------|-------------|--------------|--------------|---------|
| 1      | 14.334        | BV   | 0.2731      | 5775.56641   | 328.56348    | 8.6294  |
| 2      | 15.963        | BB   | 0.3206      | 1251.60791   | 60.69165     | 1.8701  |
| 3      | 24.555        | BB   | 0.5039      | 8682.60645   | 268.08081    | 12.9729 |
| 4      | 27.674        | VB   | 0.7027      | 5.12189e4    | 1143.29968   | 76.5276 |

**(3*R*,4*R*)-4-methyl-1-phenylhex-5-en-3-ol (2h)**

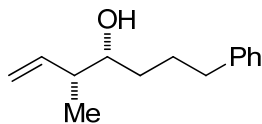

To a resealable pressure tube (13 x 100 mm) equipped with a magnetic stir bar was added RuH<sub>2</sub>(CO)(PPh<sub>3</sub>)<sub>3</sub> (13.8 mg, 0.015 mmol, 5 mol%), (*S*)-SEGPPOS (9.3 mg, 0.015 mmol, 5 mol%), TADDOL-phosphoric acid (20.9 mg, 0.03 mmol, 10 mol%). The tube was sealed with a rubber septum and purged with argon. Alcohol **1h** (46 μL, 0.30 mmol, 100 mol%) and acetone (0.30 mL, 1.0 M concentration with respect to alcohol) were added and the solution was cooled to -78 °C. Butadiene (0.10 mL, 1.20 mmol, 400 mol%) was quickly added and the rubber septum was quickly replaced with a screw cap. The mixture was heated at 95 °C (oil bath temperature) for 3 days, at which point the reaction mixture was allowed to cool to ambient temperature. The reaction mixture was concentrated *in vacuo* and purified by flash column chromatography (SiO<sub>2</sub>; hexanes:ethyl acetate = 8:1) to furnish the title compound (36 mg, 0.19 mmol, *syn:anti* = 4.5:1, 95% ee) as a colorless oil in 62% yield.

**TLC (SiO<sub>2</sub>):** R<sub>f</sub> = 0.6 (hexanes:ethyl acetate = 8:1).

**<sup>1</sup>H NMR** (400 MHz, CDCl<sub>3</sub>): δ 7.31-7.28 (m, 2H), 7.22-7.17 (m, 3H), 5.80 (ddd, *J* = 17.6, 10.0, 7.4 Hz, 1H), 5.12-5.07 (m, 2H), 3.56-3.51 (m, 1H), 2.71-2.59 (m, 2H), 2.33-2.22 (m, 1H), 1.90-1.70 (m, 1H), 1.72-1.62 (m, 1H), 1.62-1.42 (m, 2H), 1.02 (d, *J* = 6.9 Hz, 3H).

**<sup>13</sup>C NMR** (100 MHz, CDCl<sub>3</sub>): δ 142.4, 140.9, 128.4, 128.3, 125.7, 115.4, 74.5, 43.4, 35.9, 33.6, 27.9, 13.9.

**LRMS** (Cl<sup>+</sup>) *m/z* 205 [M+H]<sup>+</sup>

**FTIR** (neat): 3410, 2935, 1712, 1638, 1453, 1374, 1248, 907, 729, 698 cm<sup>-1</sup>.

**HPLC** (Chiralcel OD-H column, hexanes:*i*-PrOH = 97:3, 0.7 mL/min, 254 nm), *t*<sub>major</sub> = 15.7 min, *t*<sub>minor</sub> = 19.5 min.

**[α]<sub>D</sub><sup>25</sup>** = 28.5° (*c* = 0.8, CHCl<sub>3</sub>).

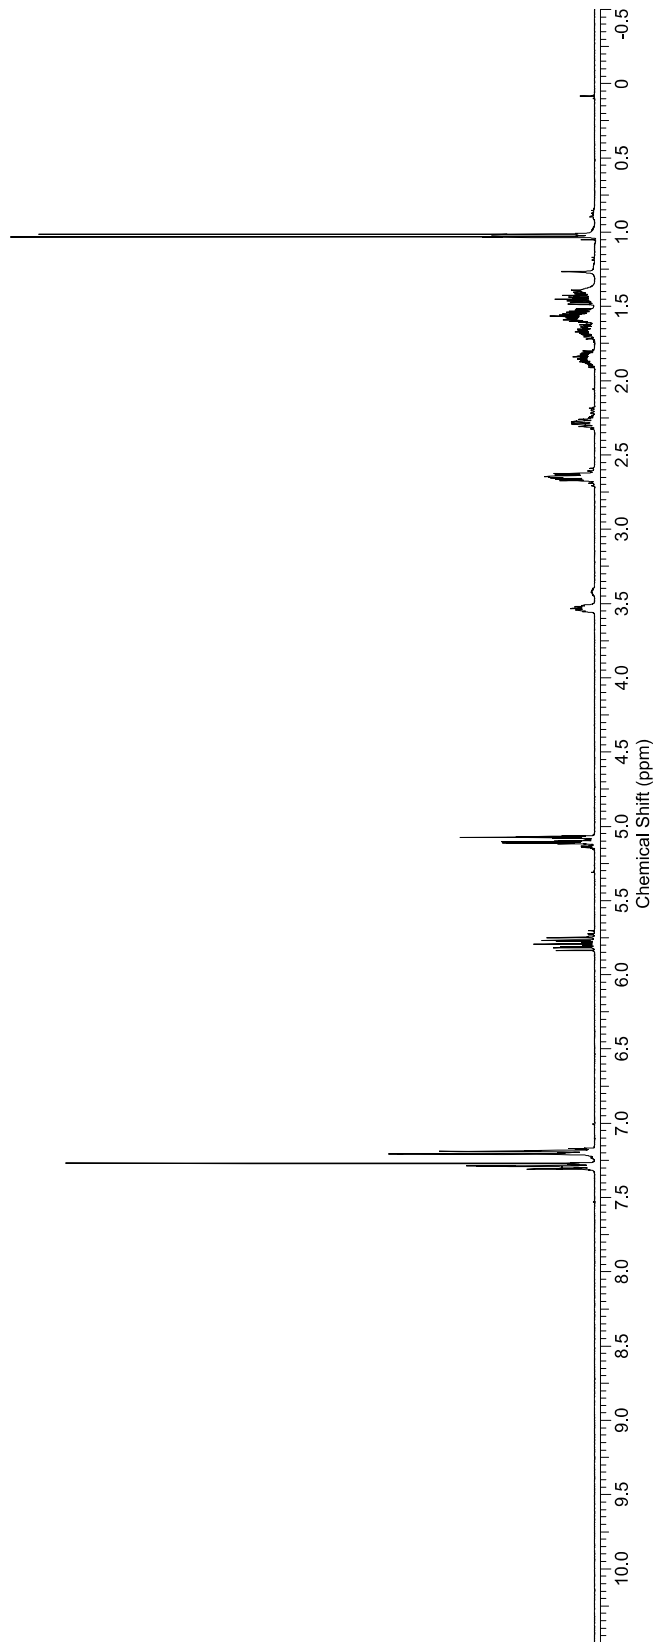



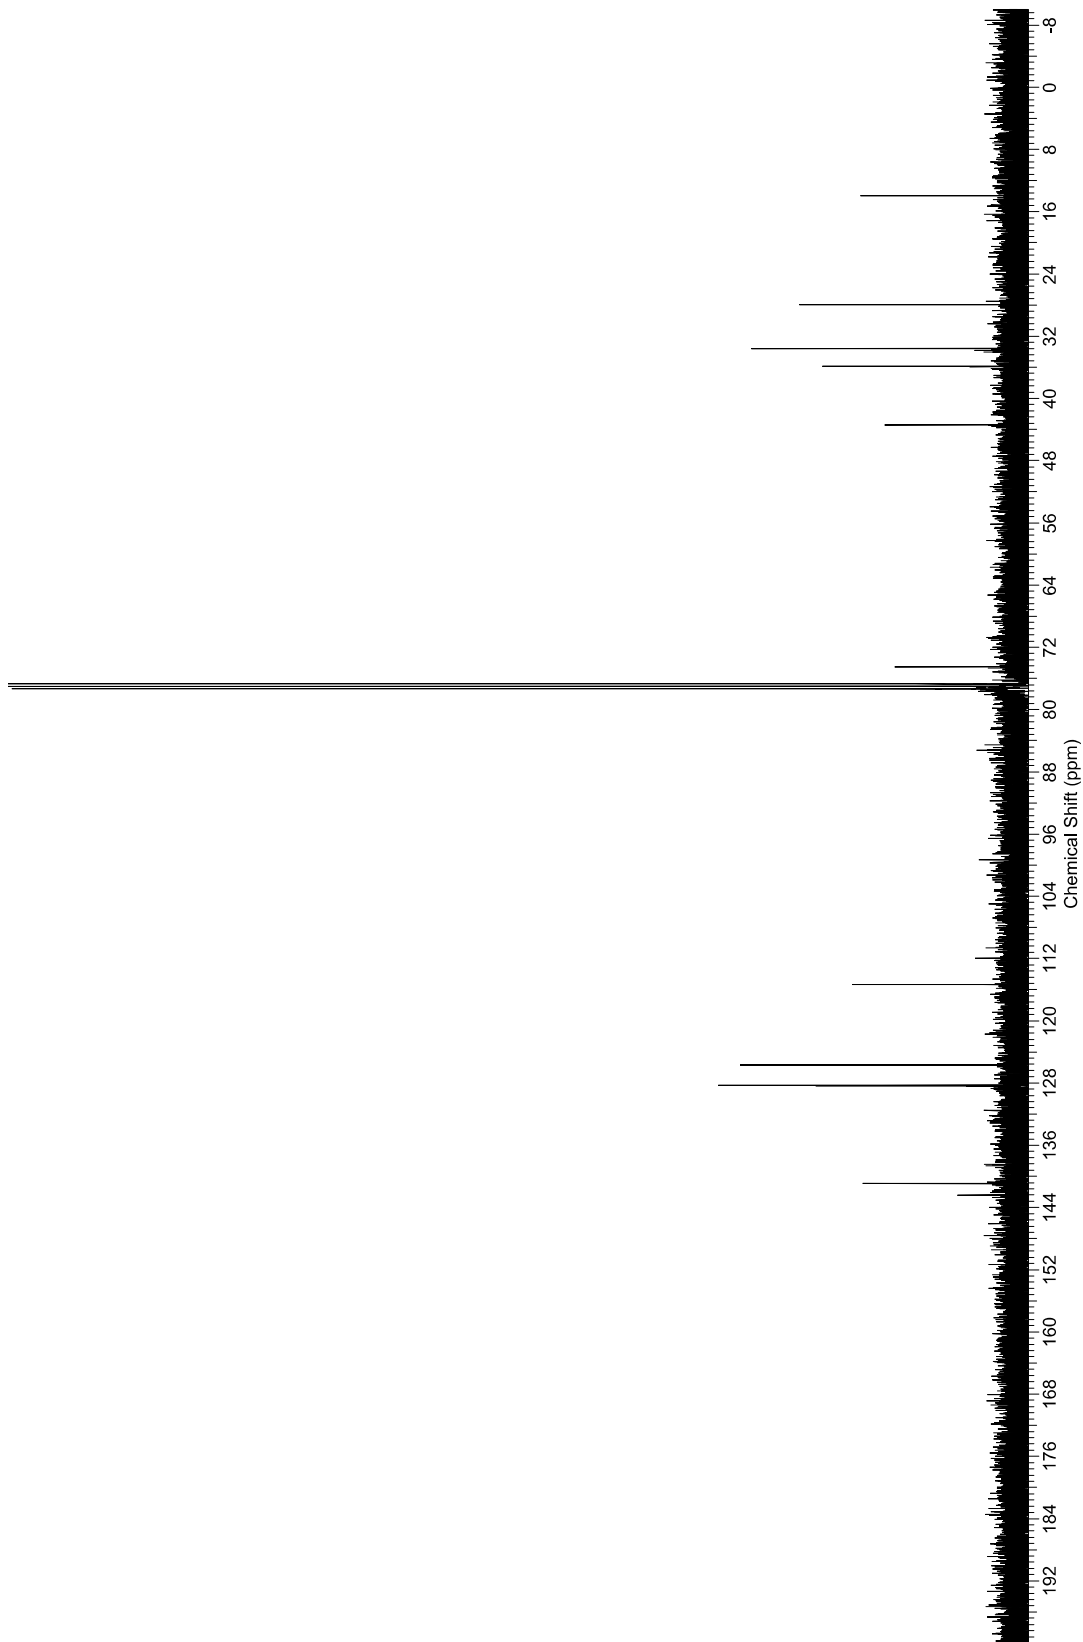

## HPLC (*racemic*)

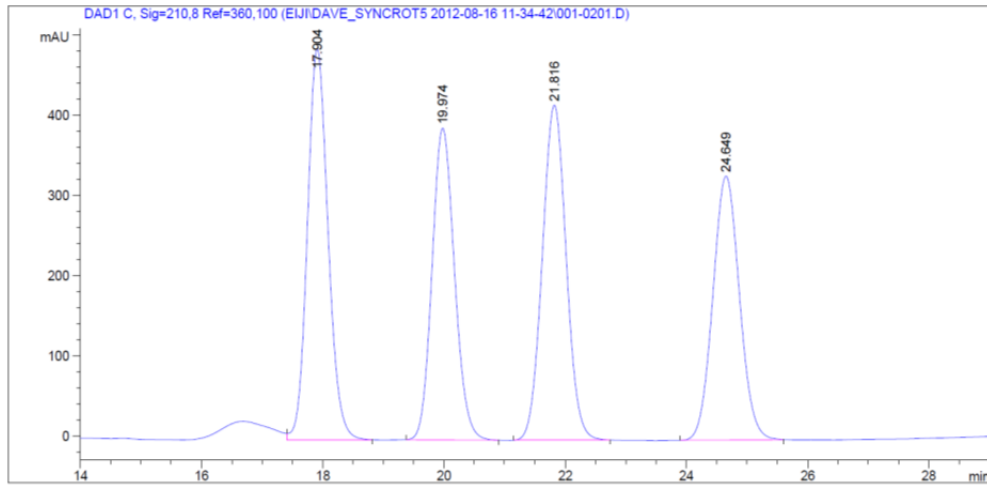

| Peak # | RetTime [min] | Type | Width [min] | Area [mAU*s] | Height [mAU] | Area %  |
|--------|---------------|------|-------------|--------------|--------------|---------|
| 1      | 17.904        | VB   | 0.3662      | 1.15484e4    | 487.85025    | 26.8037 |
| 2      | 19.974        | BB   | 0.4009      | 1.00295e4    | 388.81464    | 23.2783 |
| 3      | 21.816        | BB   | 0.4279      | 1.14574e4    | 417.88657    | 26.5924 |
| 4      | 24.649        | BB   | 0.4742      | 1.00498e4    | 329.15356    | 23.3255 |

## HPLC (*chiral*)

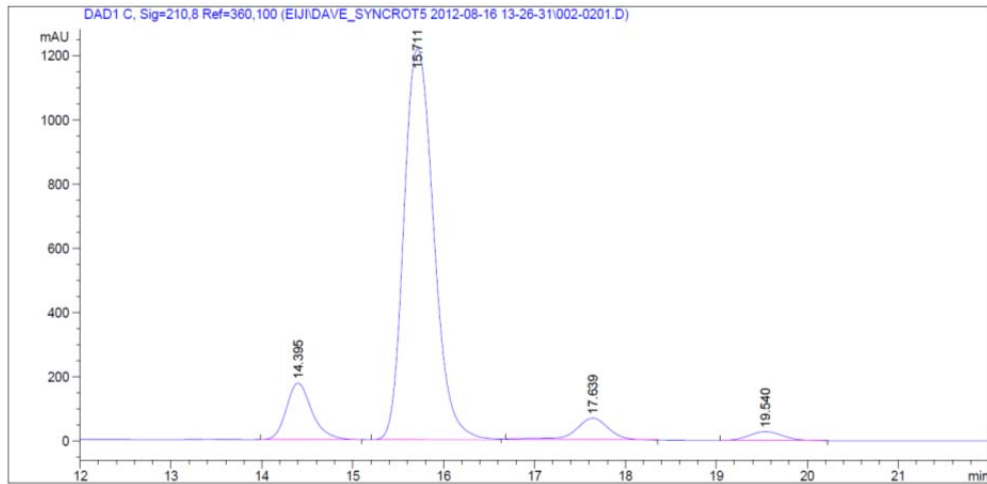

| Peak # | RetTime [min] | Type | Width [min] | Area [mAU*s] | Height [mAU] | Area %  |
|--------|---------------|------|-------------|--------------|--------------|---------|
| 1      | 14.395        | BB   | 0.2980      | 3448.26074   | 176.45856    | 10.2137 |
| 2      | 15.711        | BB   | 0.3603      | 2.77890e4    | 1217.29614   | 82.3107 |
| 3      | 17.639        | BB   | 0.3953      | 1806.00403   | 68.11464     | 5.3494  |
| 4      | 19.540        | BB   | 0.3905      | 717.86218    | 27.86927     | 2.1263  |

**(3*R*,4*R*)-1-(furan-2-yl)-4-methylhex-5-en-3-ol (2i)**

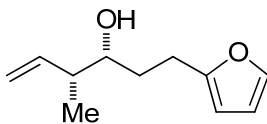

To a resealable pressure tube (13 x 100 mm) equipped with a magnetic stir bar was added RuH<sub>2</sub>(CO)(PPh<sub>3</sub>)<sub>3</sub> (19.3 mg, 0.021 mmol, 7 mol%), (*S*)-SEGPPOS (13.0 mg, 0.021 mmol, 7 mol%), TADDOL-phosphoric acid (29.3 mg, 0.042 mmol, 14 mol%). The tube was sealed with a rubber septum and purged with argon. Alcohol **1i** (36  $\mu$ L, 0.30 mmol, 100 mol%) and acetone (0.30 mL, 1.0 M concentration with respect to alcohol) were added and the solution was cooled to -78 °C. Butadiene (0.10 mL, 1.20 mmol, 400 mol%) was quickly added and the rubber septum was quickly replaced with a screw cap. The mixture was heated at 95 °C (oil bath temperature) for 3 days, at which point the reaction mixture was allowed to cool to ambient temperature. The reaction mixture was concentrated *in vacuo* and purified by flash column chromatography (SiO<sub>2</sub>; hexanes:ethyl acetate = 10:1) to furnish the title compound (37.3 mg, 0.21 mmol, *syn:anti* = 4.0:1, 95% ee) as a colorless oil in 69% yield.

**TLC (SiO<sub>2</sub>):** R<sub>f</sub> = 0.35 (hexanes:ethyl acetate = 10:1).

**<sup>1</sup>H NMR** (400 MHz, CDCl<sub>3</sub>):  $\delta$  7.31 (d, *J* = 2.1 Hz, 1H), 6.29 (dd, *J* = 3.1, 2.2 Hz, 1H), 6.02 (d, *J* = 3.1 Hz, 1H), 5.83-5.71 (m, 1H), 5.16-5.08 (m, 2H), 3.52 (dd, *J* = 9.6, 5.1, 3.3 Hz, 1H), 2.90-2.82 (m, 1H), 2.77-2.67 (m, 1H), 2.35-2.25 (m, 1H), 1.95-1.84 (m, 1H), 1.73-1.63 (m, 1H), 1.56 (brs, 1H), 1.05 (d, *J* = 6.9 Hz, 3H).

**<sup>13</sup>C NMR** (100 MHz, CDCl<sub>3</sub>):  $\delta$  155.9, 140.9, 146.6, 115.6, 110.1, 104.9, 73.9, 43.7, 32.4, 24.7, 14.3.

**LRMS** (CI+) *m/z* 181 [M+H]<sup>+</sup>

**FTIR** (neat): 3370, 2961, 1639, 1507, 1452, 1145, 1043, 914, 726 cm<sup>-1</sup>.

**HPLC** (Chiralpak AS-H/AS-H column, hexanes:*i*-PrOH = 99:1, 0.5 mL/min, 254 nm). *t*<sub>minor</sub> = 29.5 min, *t*<sub>major</sub> = 31.4 min.

**[ $\alpha$ ]<sub>D</sub><sup>25</sup>** = 49.3° (*c* = 1.0, CHCl<sub>3</sub>).

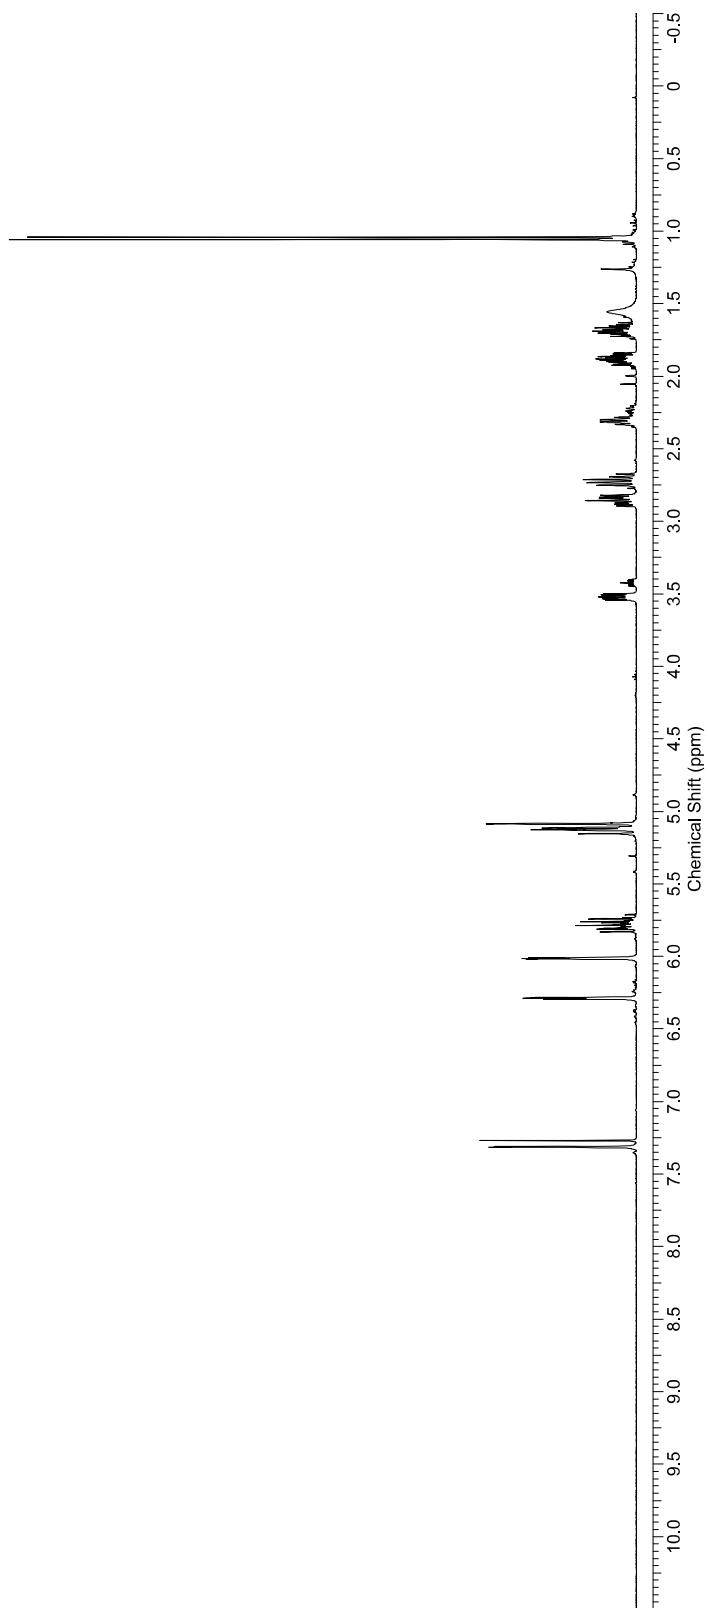

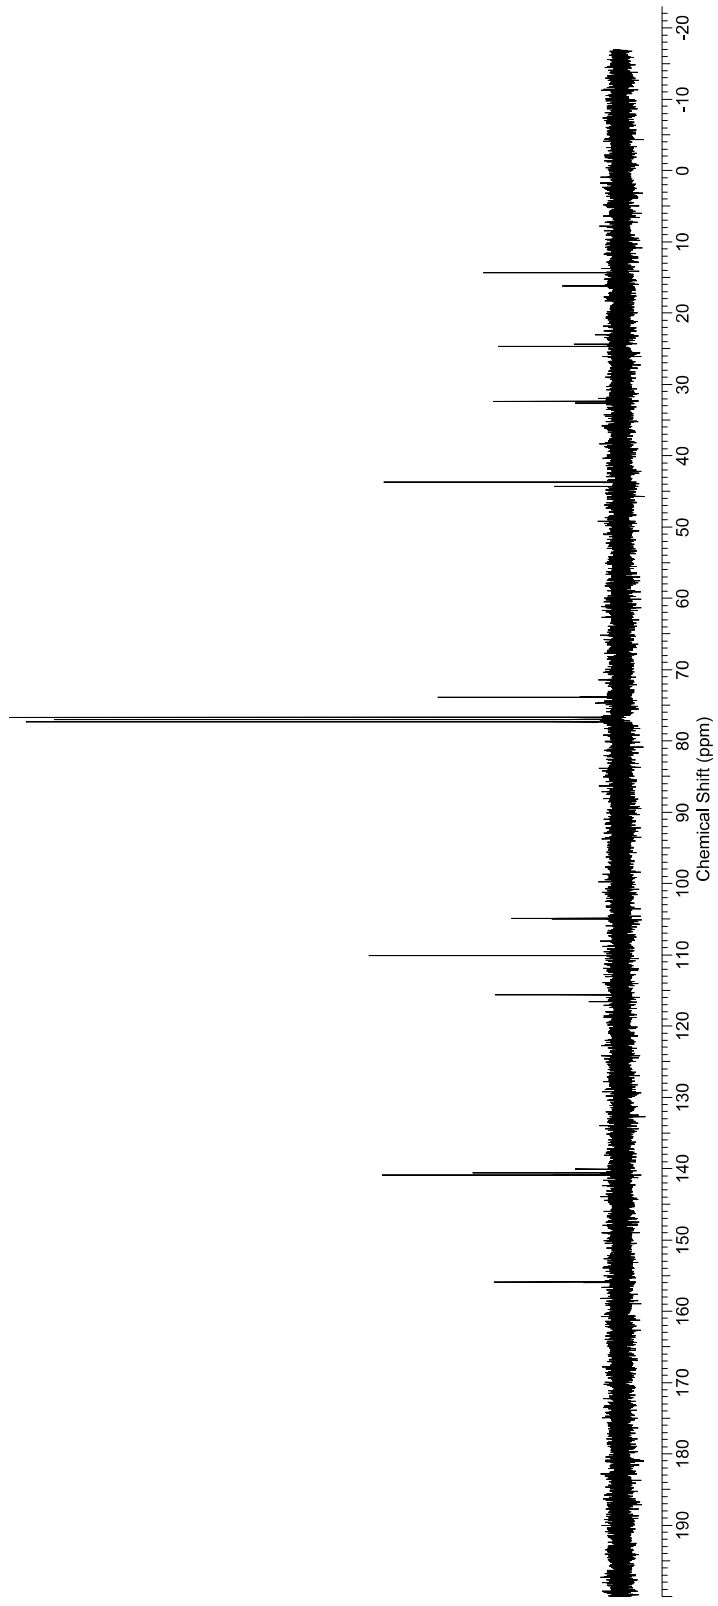

## HPLC (*racemic*)

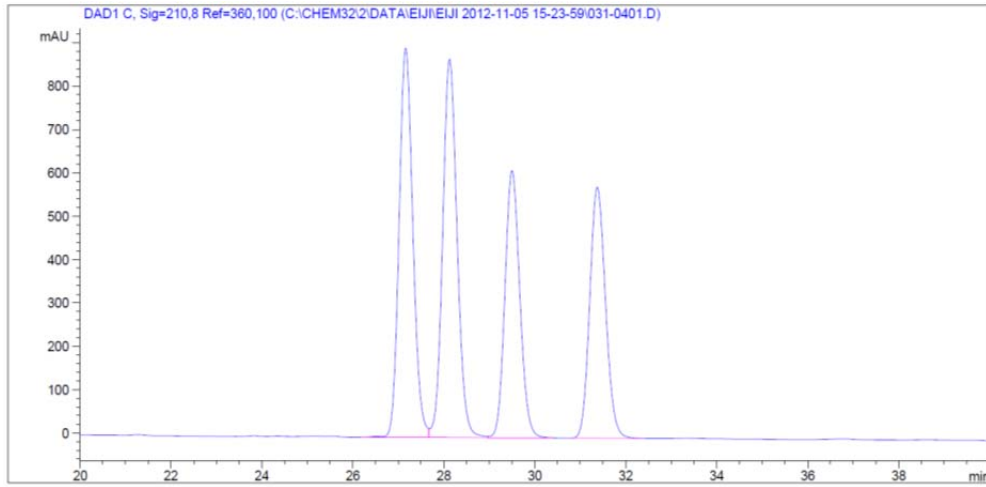

| Peak # | RetTime [min] | Type | Width [min] | Area [mAU*s] | Height [mAU] | Area %  |
|--------|---------------|------|-------------|--------------|--------------|---------|
| 1      | 27.156        | VV   | 0.3256      | 1.89015e4    | 897.77155    | 28.5902 |
| 2      | 28.121        | VV   | 0.3411      | 1.92335e4    | 872.70227    | 29.0924 |
| 3      | 29.494        | VB   | 0.3532      | 1.40048e4    | 616.20392    | 21.1835 |
| 4      | 31.368        | BB   | 0.3736      | 1.39720e4    | 578.92444    | 21.1339 |

## HPLC (*chiral*)

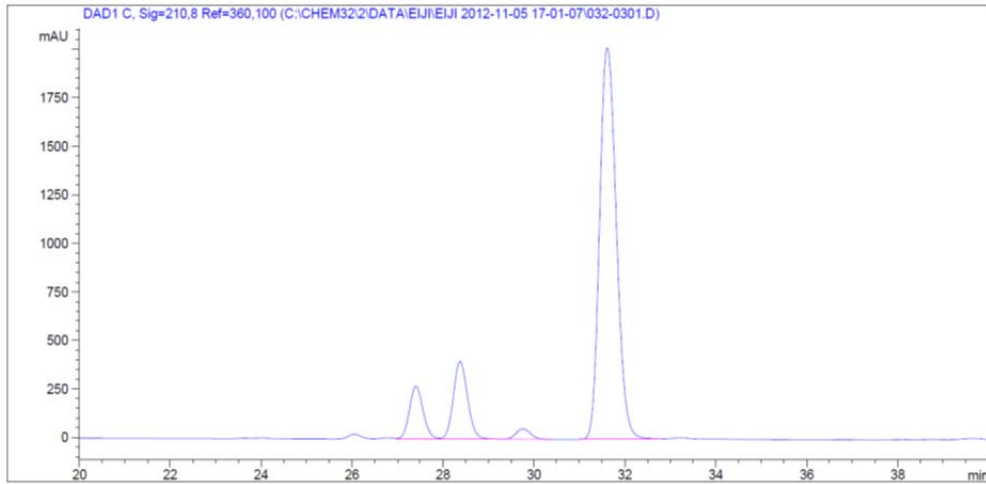

| Peak # | RetTime [min] | Type | Width [min] | Area [mAU*s] | Height [mAU] | Area %  |
|--------|---------------|------|-------------|--------------|--------------|---------|
| 1      | 27.400        | VV   | 0.3276      | 5740.44824   | 272.63837    | 8.5186  |
| 2      | 28.371        | VB   | 0.3397      | 8798.17676   | 401.36823    | 13.0562 |
| 3      | 29.753        | BB   | 0.3517      | 1231.96143   | 54.50950     | 1.8282  |
| 4      | 31.609        | BB   | 0.4027      | 5.16164e4    | 2015.88220   | 76.5970 |

**(3*R*,4*R*)-1-(6-bromopyridin-2-yl)-4-methylhex-5-en-3-ol (2j)**

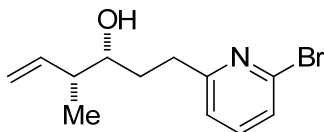

To a resealable pressure tube (13 x 100 mm) equipped with a magnetic stir bar was added RuH<sub>2</sub>(CO)(PPh<sub>3</sub>)<sub>3</sub> (19.3 mg, 0.021 mmol, 7 mol%), (*S*)-SEGPHOS (13.0 mg, 0.021 mmol, 7 mol%), TADDOL-phosphoric acid (29.3 mg, 0.042 mmol, 14 mol%). The tube was sealed with a rubber septum and purged with argon. Alcohol **1j** (64.5 mg, 0.30 mmol, 100 mol%) and acetone (0.30 mL, 1.0 M concentration with respect to alcohol) were added and the solution was cooled to -78 °C. Butadiene (0.10 mL, 1.20 mmol, 400 mol%) was quickly added and the rubber septum was quickly replaced with a screw cap. The mixture was heated at 95 °C (oil bath temperature) for 3 days, at which point the reaction mixture was allowed to cool to ambient temperature. The reaction mixture was concentrated *in vacuo* and purified by flash column chromatography (SiO<sub>2</sub>; hexanes:ethyl acetate = 4:1) to furnish the title compound (52 mg, 0.19 mmol, *syn:anti* = 3.8:1, 96% ee) as a colorless oil in 63% yield.

**TLC (SiO<sub>2</sub>):** R<sub>f</sub> = 0.3 (hexanes:ethyl acetate = 4:1).

**<sup>1</sup>H NMR** (400 MHz, CDCl<sub>3</sub>): δ 7.45 (dd, *J* = 7.8, 7.4 Hz, 1H), 7.32 (*J* = 7.8 Hz, 1H), 7.12 (d, *J* = 7.6 Hz, 1H), 5.82-5.74 (m, 1H), 5.12-5.05 (m, 2H), 3.51 (ddd, *J* = 9.8, 5.4, 2.9 Hz, 1H), 3.01-2.96 (m, 1H), 2.89-2.76 (m, 1H), 2.33-2.28 (m, 1H), 1.98-1.93 (m, 1H), 1.79-1.68 (m, 1H), 1.05 (d, *J* = 6.9 Hz, 1H).

**<sup>13</sup>C NMR** (100 MHz, CDCl<sub>3</sub>): δ 163.6, 141.4, 140.8, 138.8, 125.4, 121.8, 115.4, 74.2, 43.9, 34.6, 33.5, 14.7.

**LRMS** (Cl<sup>+</sup>) *m/z* 270 [M]<sup>+</sup>

**FTIR** (neat): 3376, 2961, 1582, 1552, 1436, 1405, 1121, 985, 909, 789, 730 cm<sup>-1</sup>.

**HPLC** (Chiralcel OD-H column, hexanes:*i*-PrOH = 99:1, 0.4 mL/min, 254 nm). *t*<sub>minor</sub> = 49.0 min, *t*<sub>major</sub> = 62.4 min.

**[α]<sub>D</sub><sup>25</sup>** = -95.6° (*c* = 1.0, CHCl<sub>3</sub>).

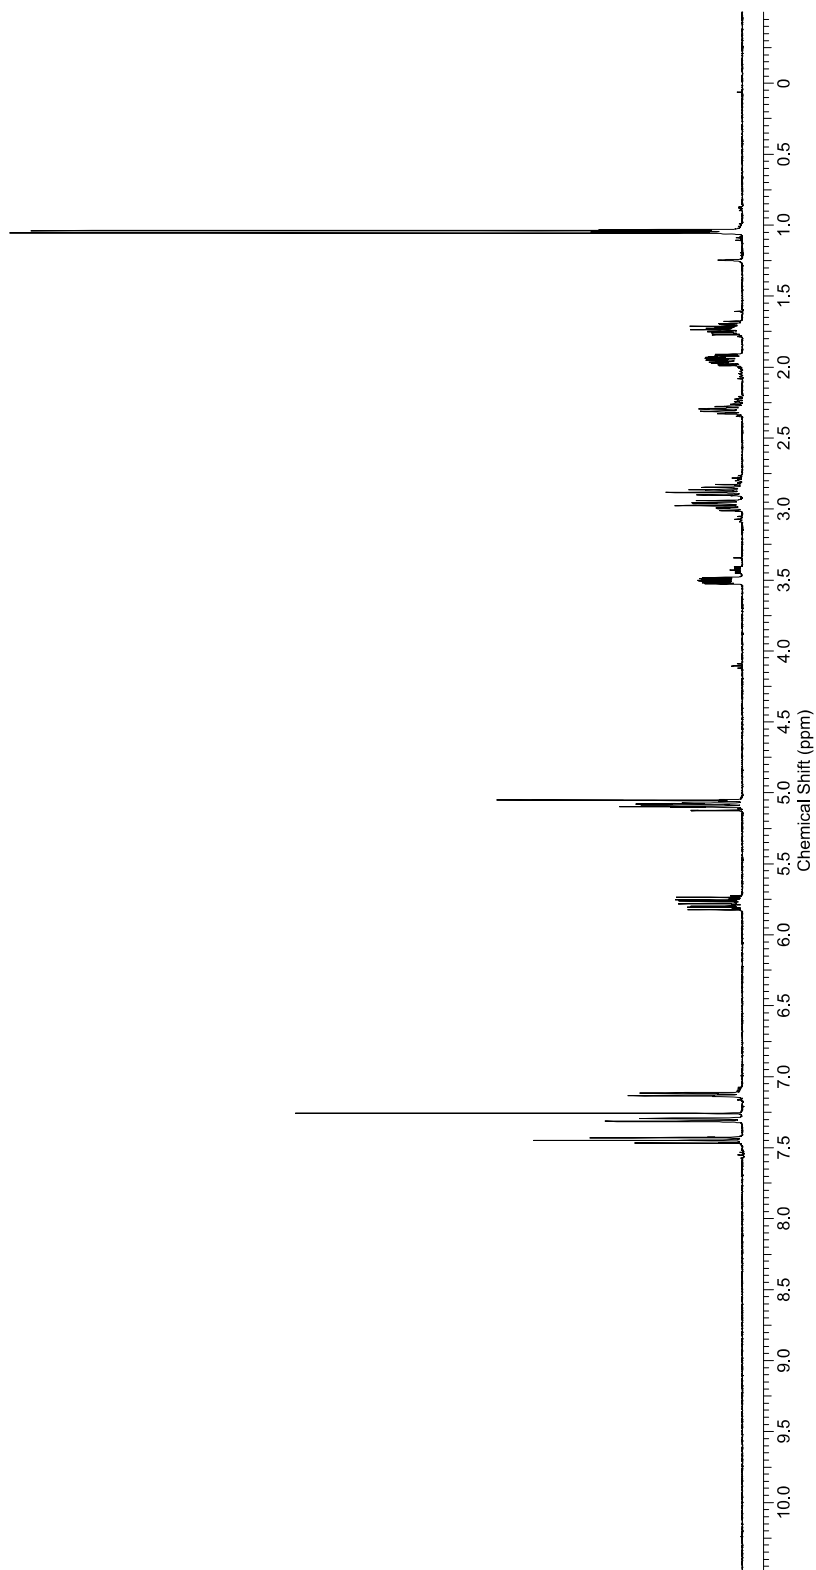



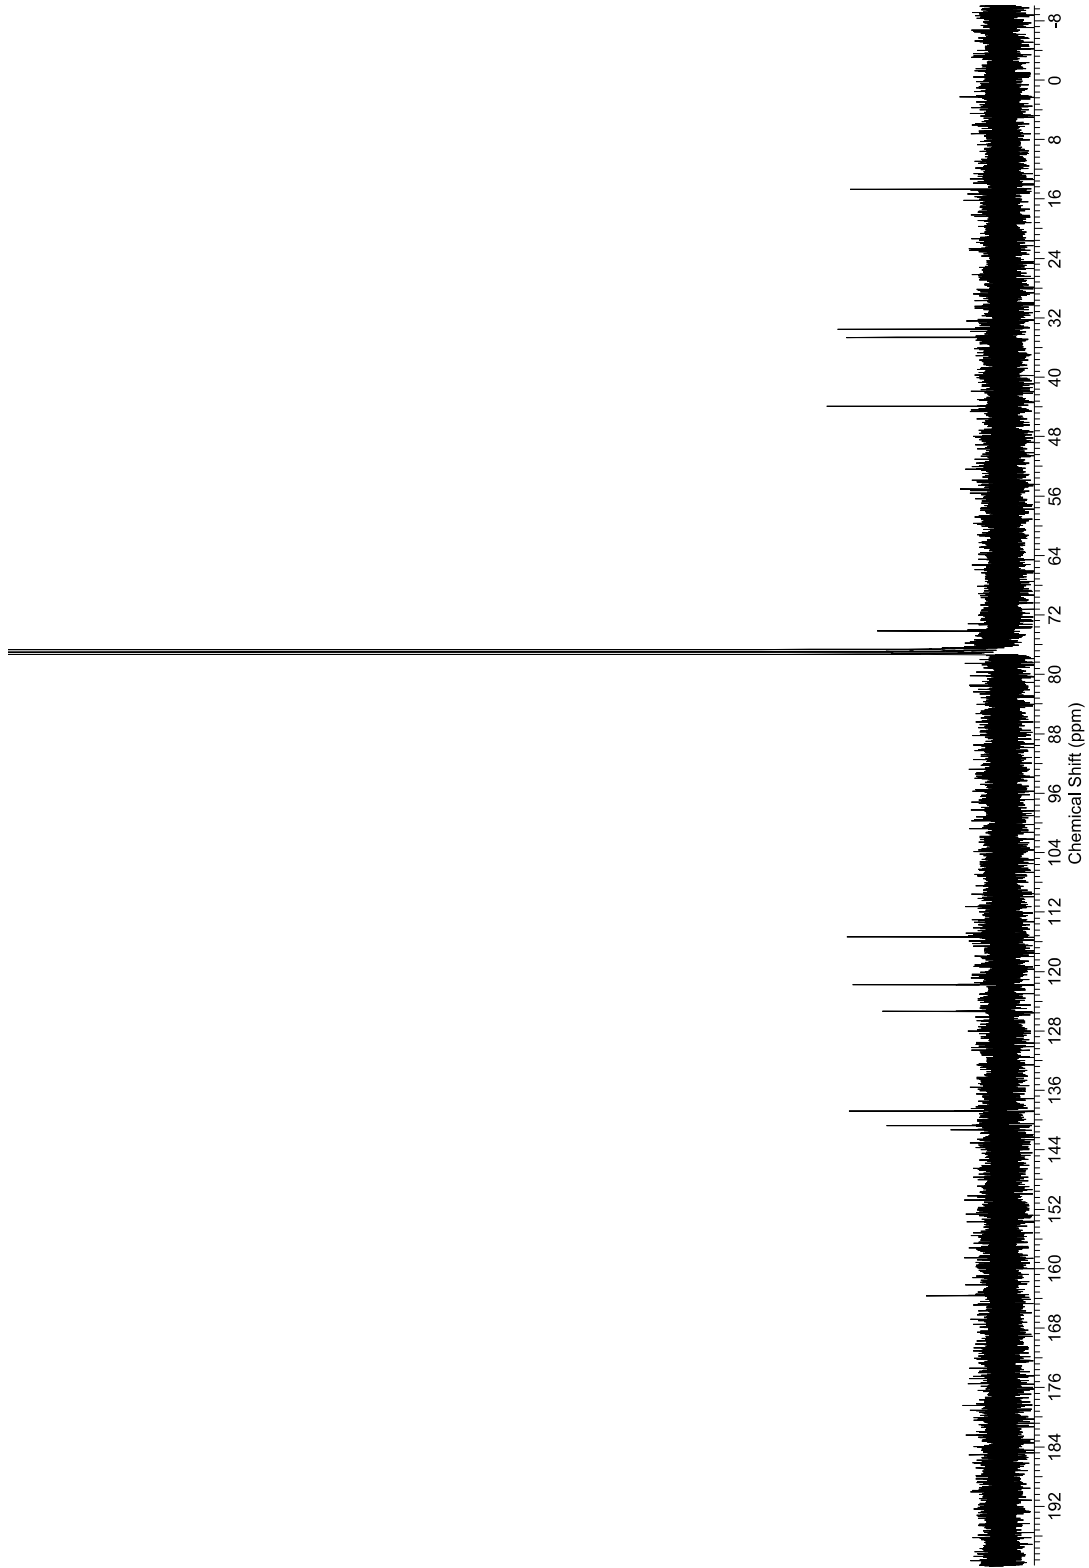

## HPLC (racemic)

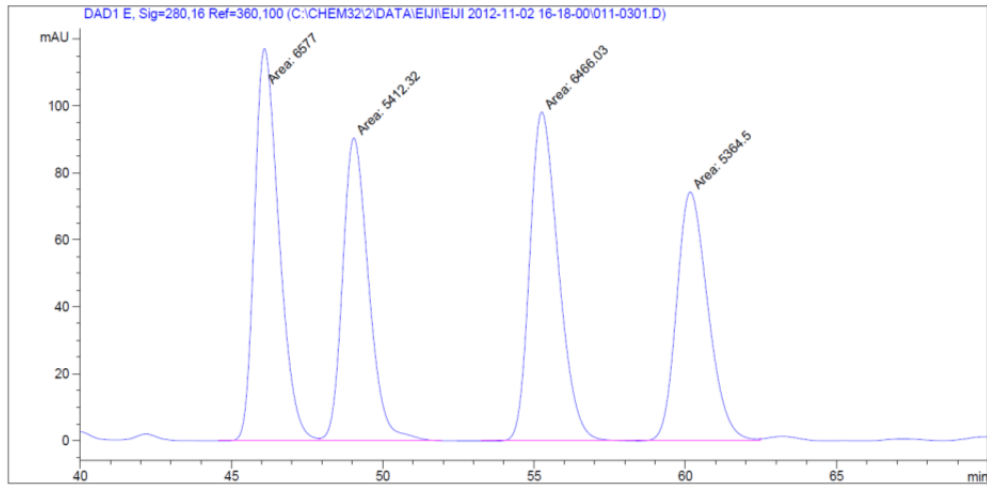

| Peak # | RetTime [min] | Type | Width [min] | Area [mAU*s] | Height [mAU] | Area %  |
|--------|---------------|------|-------------|--------------|--------------|---------|
| 1      | 46.088        | MM   | 0.9353      | 6576.99756   | 117.20226    | 27.6114 |
| 2      | 49.040        | MM   | 0.9966      | 5412.32031   | 90.51325     | 22.7219 |
| 3      | 55.250        | MM   | 1.0966      | 6466.02979   | 98.27155     | 27.1456 |
| 4      | 60.157        | MM   | 1.2025      | 5364.49658   | 74.34969     | 22.5211 |

## HPLC (chiral)

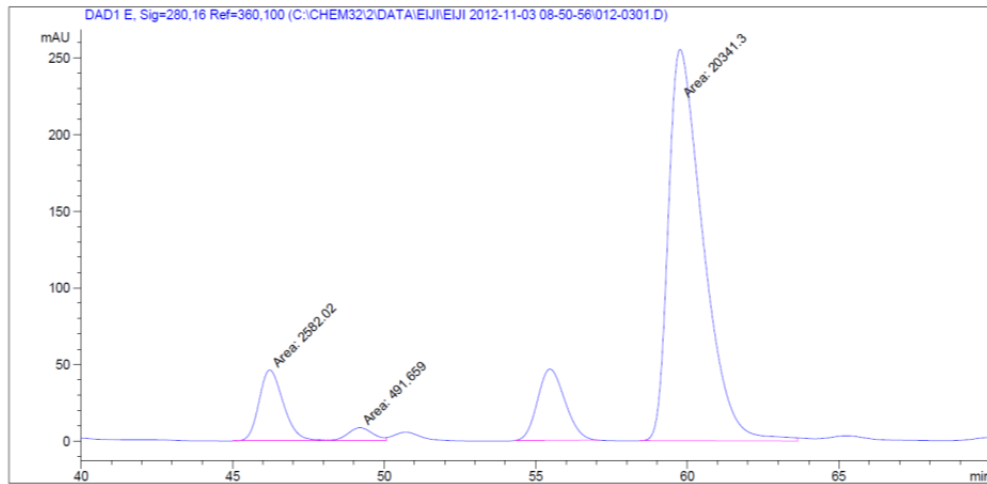

| Peak # | RetTime [min] | Type | Width [min] | Area [mAU*s] | Height [mAU] | Area %  |
|--------|---------------|------|-------------|--------------|--------------|---------|
| 1      | 46.217        | MM   | 0.9310      | 2582.01611   | 46.22234     | 9.7920  |
| 2      | 49.192        | MM   | 0.9643      | 491.65936    | 8.49779      | 1.8646  |
| 3      | 55.461        | BB   | 0.9808      | 2953.74561   | 46.64143     | 11.2017 |
| 4      | 59.753        | MM   | 1.3280      | 2.03413e4    | 255.28479    | 77.1418 |

## Synthesis of TADDOL-derived phosphoric acid

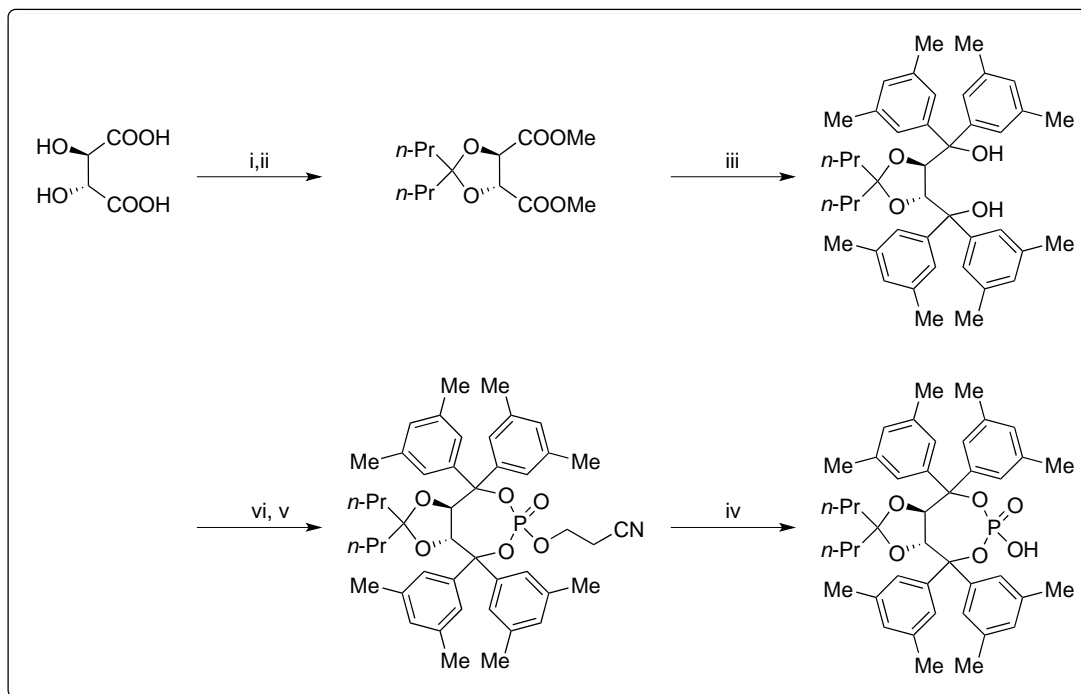

**Figure S1: Synthetic Approach to TADDOL-derived Phosphoric Acids**

(i) SOCl<sub>2</sub>, MeOH, rt, 18h.<sup>9</sup> (ii) 4-heptanone (100 mol%), HC(OMe)<sub>3</sub> (130 mol%), PTSA (10 mol%), reflux, 8h.<sup>10</sup> (iii) 3,5-dimethylphenylmagnesium bromide (800 mol%), THF, reflux, 18h. (vi) PCl<sub>3</sub> (105 mol%), Et<sub>3</sub>N (340 mol%), THF, 0 °C 1h then 3-hydroxypropionitrile (110 mol%), rt, 18h. (v) H<sub>2</sub>O<sub>2</sub> (620 mol%), DCM, rt, 30 min. (iv) DBU (105 mol%), THF, rt, 30 min.

<sup>9</sup> Lu, X.; Byun, H.-S.; Bittman, R. *J. Org. Chem.* **2004**, *69*, 5433.

<sup>10</sup> Jozak, T.; Sun, Y.; Thiel, R. W. *New J. Chem.* **2011**, *35*, 2114.

**((4R,5R)-2,2-dipropyl-1,3-dioxolane-4,5-diyl)bis{di(3,5-dimethylphenyl)-3-ylmethanol}**

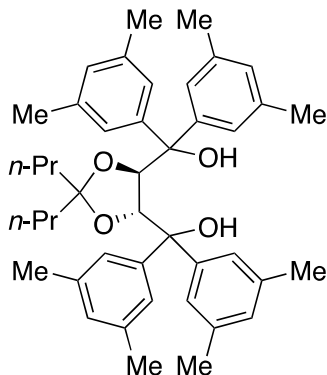

(R,R)-2,2-Dipropyl-[1,3]dioxolane-4,5-dicarboxylic acid dimethylester (1.37 g, 5 mmol) in THF (10 mL) was added dropwise to a solution of 3,5-dimethylphenylmagnesium bromide (40 mmol, prepared from 5.5 mL of 5-bromo-*m*-xylene and 1.10 g of Mg) in THF (40 mL). The reaction mixture was stirred for 18h and then treated with saturated aqueous NH<sub>4</sub>Cl solution. The organic layer was extracted with Et<sub>2</sub>O (3x50 mL) and the combined organic extracts were washed with brine, dried (MgSO<sub>4</sub>), filtered, and concentrated *in vacuo*. The residue was purified by column chromatography (SiO<sub>2</sub>; hexanes:Et<sub>2</sub>O = 10:1) to provide the title compound (2.07 g, 1.3 mmol) as a white form in 65% yield.

**TLC (SiO<sub>2</sub>):** R<sub>f</sub> = 0.13 (hexanes:Et<sub>2</sub>O = 10:1)

**m.p.:** 106-108 °C.

**<sup>1</sup>H NMR** (400 MHz, CDCl<sub>3</sub>): δ 7.13 (s, 4H), 6.97 (s, 4H), 6.93 (s, 2H), 6.87 (s, 2H), 4.38 (s, 2H), 4.05 (brs, 2H), 2.31 (s, 12H), 2.24 (s, 12H), 1.35-1.16 (m, 8 H), 0.81 (t, *J* = 7.04 Hz, 6H).

**<sup>13</sup>C NMR** (100 MHz, CDCl<sub>3</sub>): δ 146.2, 142.6, 137.3, 136.3, 129.1, 126.6, 126.3, 125.4, 111.2, 80.5, 78.0, 39.9, 21.6, 17.2, 14.4.

**HRMS** (ESI) Calcd. for C<sub>43</sub>H<sub>54</sub>NaO<sub>4</sub> [M+Na]<sup>+</sup>: 657.3914, Found: 657.3910.

**FTIR** (neat): 3293, 2958, 2916, 2359, 1601, 1454, 1314, 1167, 1060, 850, 736 cm<sup>-1</sup>.

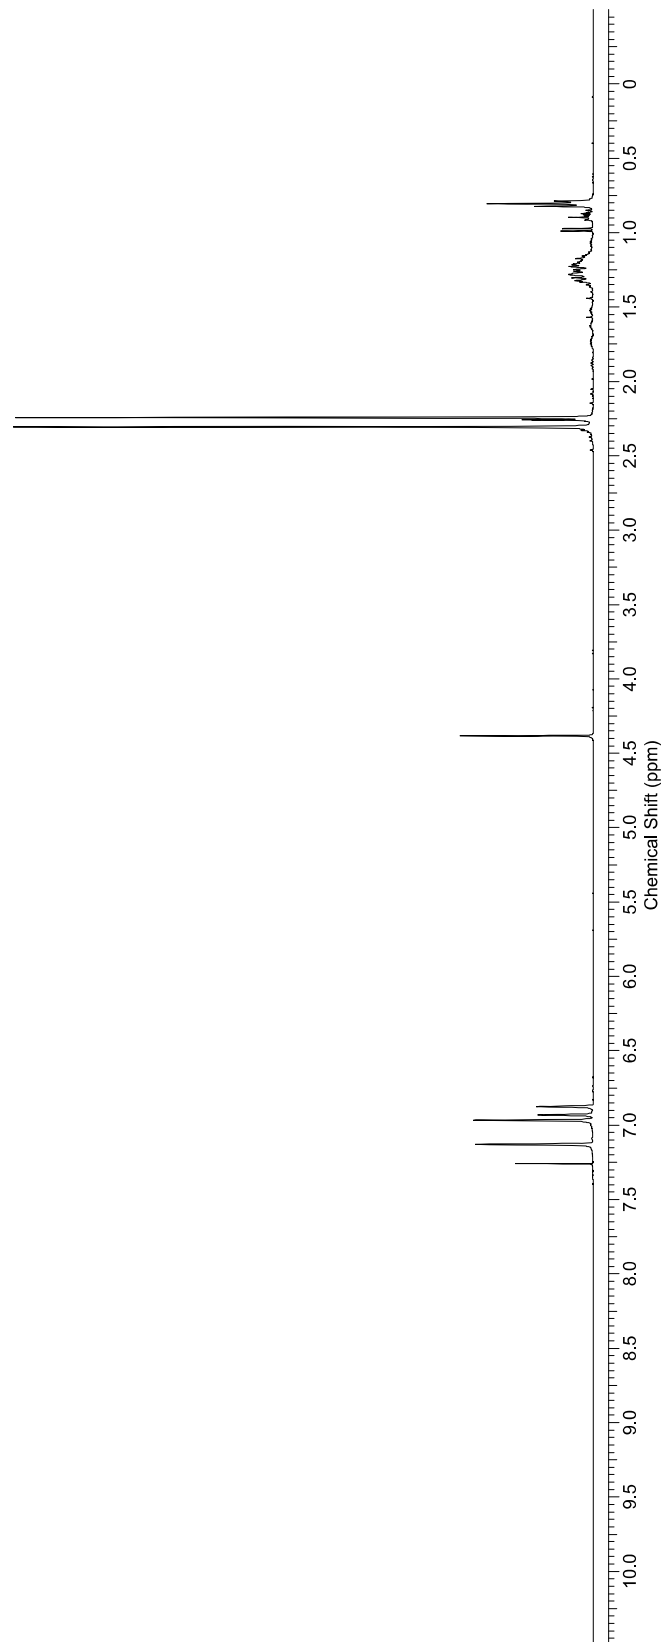

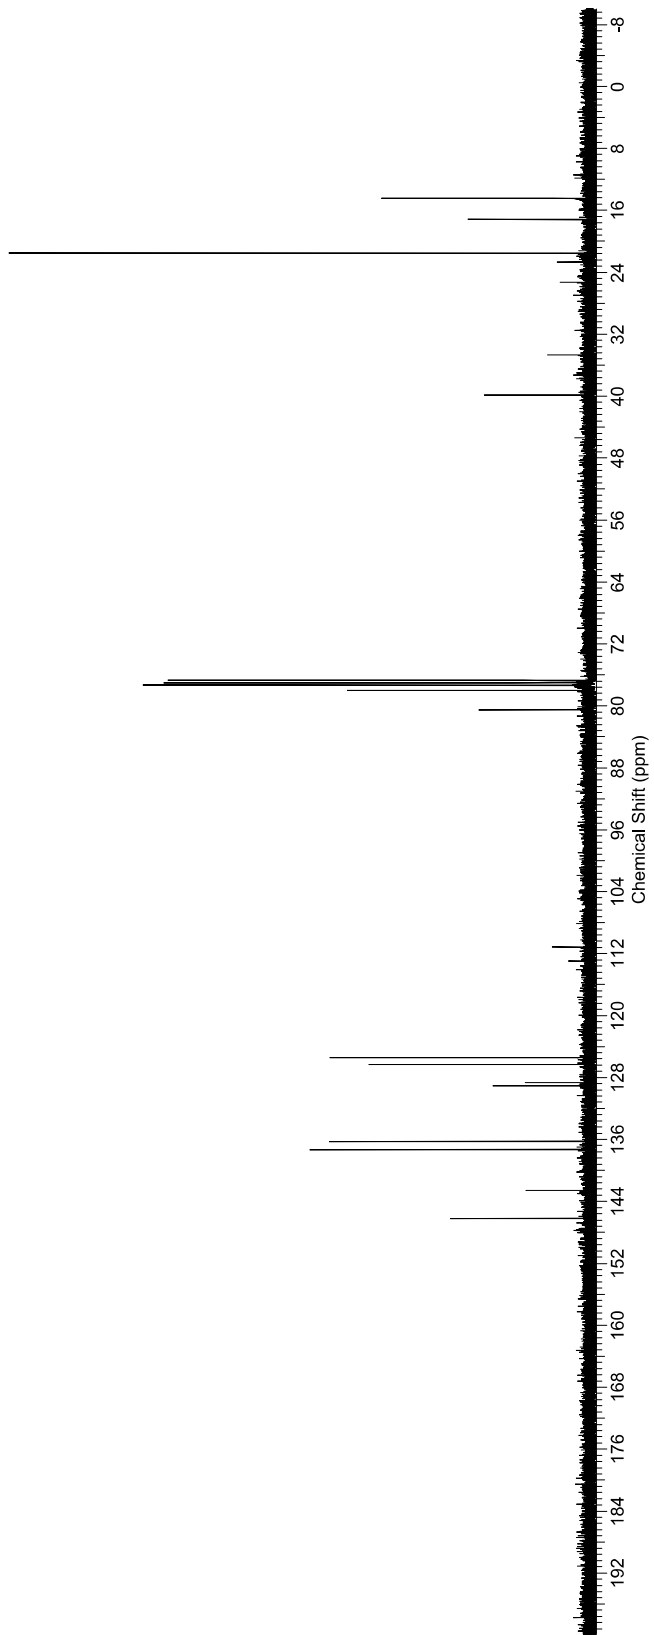

**3-[[[(3a*R*,8a*R*)-2,2-dipropyl-4,4,8,8-tetrakis(3,5-dimethylphenyl)-6-oxidotetrahydro-[1,3]dioxolo[4,5-*e*][1,3,2]dioxaphosphepin-6-yl]oxy]propanenitrile**

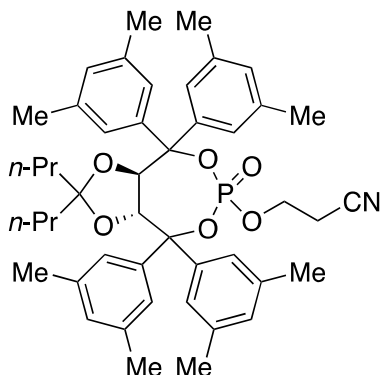

To a stirred solution of (*R,R*)-(*n*-Pr,*n*-Pr)-TADDOL-(xylyl) (1.26 g, 2.0 mmol) and triethylamine (0.94 mL, 6.8 mmol, 340 mol%) in dry THF (10 mL) at 0 °C was added dropwise PCl<sub>3</sub> (184 μL, 2.1 mmol, 105 mol%). The resulting mixture was stirred at 0 °C for 1h. The 3-hydroxypropionitrile (150 μL, 2.2 mmol, 110 mol%) in dry THF (10 mL) was then added dropwise. The reaction mixture was allowed to warm to room temperature and stirred for 18h. The reaction mixture was diluted with Et<sub>2</sub>O and the triethylammonium chloride salts were filtered through a celite pad. The solvent was removed in vacuo. To the crude phosphine in CH<sub>2</sub>Cl<sub>2</sub> (20 mL) was added 30% aqueous H<sub>2</sub>O<sub>2</sub> (1.40 mL, 12.4 mmol, 6.2 equiv). The biphasic mixture was stirred vigorously for 30 min and then quenched by the addition of 50 mL of saturated aqueous NaHCO<sub>3</sub> solution. The mixture was extracted with CH<sub>2</sub>Cl<sub>2</sub> and the combined organic extracts were washed with saturated aqueous NaCl, dried (MgSO<sub>4</sub>), filtered and concentrated. Purification by flash chromatography (hexane:Et<sub>2</sub>O = 80:20 to 0:100) afforded 1.16 g (77% for two steps) of title compound as a white solid.

**TLC (SiO<sub>2</sub>):** R<sub>f</sub> = 0.35 (hexanes:Et<sub>2</sub>O = 1:1)

**m.p.:** 120-122 °C.

**<sup>1</sup>H NMR** (400 MHz, CDCl<sub>3</sub>): δ 7.20n (s, 2H), 7.18 (s, 2H), 7.02 (s, 1H), 6.99 (s, 2H), 6.96 (s, 1H), 6.92 (s, 1H), 6.91 (s, 1H), 6.91 (s, 2H), 5.32 (d, *J* = 8.4 Hz, 1H), 5.11 (d, *J* = 8.4 Hz, 1H), 3.99-3.91 (m, 1H), 3.41-3.34 (m, 1H), 2.36 (s, 6H), 2.34 (s, 6H), 2.30 (s, 6H), 2.25 (s, 6H), 2.23-2.17 (m, 1H), 2.03-1.97 (m, 1H), 1.31-0.86 (m, 8H), 0.68 (t, *J* = Hz, 3H), 0.56 (t, *J* = Hz, 3H).

**<sup>13</sup>C NMR** (100 MHz, CDCl<sub>3</sub>): δ 143.9, 143.4 (d, *J*<sub>P-C</sub> = 3.0 Hz), 140.1 (d, *J*<sub>P-C</sub> = 7.5 Hz), 139.5 (d, *J*<sub>P-C</sub> = 6.0 Hz), 137.9, 137.4, 136.7, 136.4, 130.0, 129.9, 129.4, 129.3, 126.8, 126.2, 125.2, 124.7, 116.3, 116.1, 89.5 (d, *J*<sub>P-C</sub> = 7.5 Hz), 88.5 (d, *J*<sub>P-C</sub> = 8.3 Hz), 79.5, 61.7 (d, *J*<sub>P-C</sub> = 4.5 Hz), 39.6, 39.2, 21.6, 21.5, 21.5, 21.4, 18.9 (d, *J*<sub>P-C</sub> = 8.9 Hz), 16.6, 16.7, 14.2, 14.1.

**<sup>31</sup>P NMR** (162 MHz, CDCl<sub>3</sub>): δ -13.1.

**HRMS** (ESI) Calcd. for C<sub>46</sub>H<sub>56</sub>NNaO<sub>6</sub>P [M+Na]<sup>+</sup>: 772.3738, Found: 772.3738.

**FTIR** (neat): 2953, 2240, 1603, 1456, 1285, 1032, 994, 854, 741 cm<sup>-1</sup>.



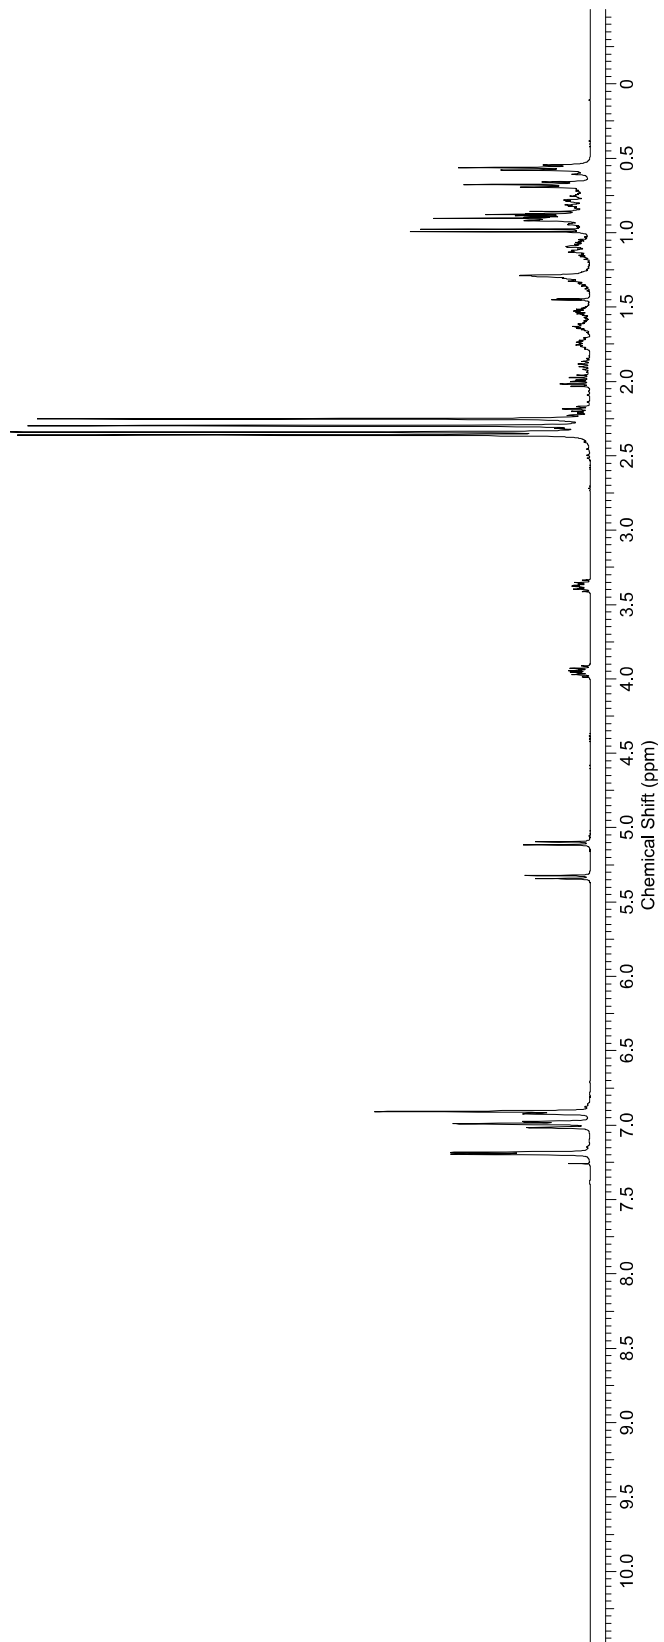

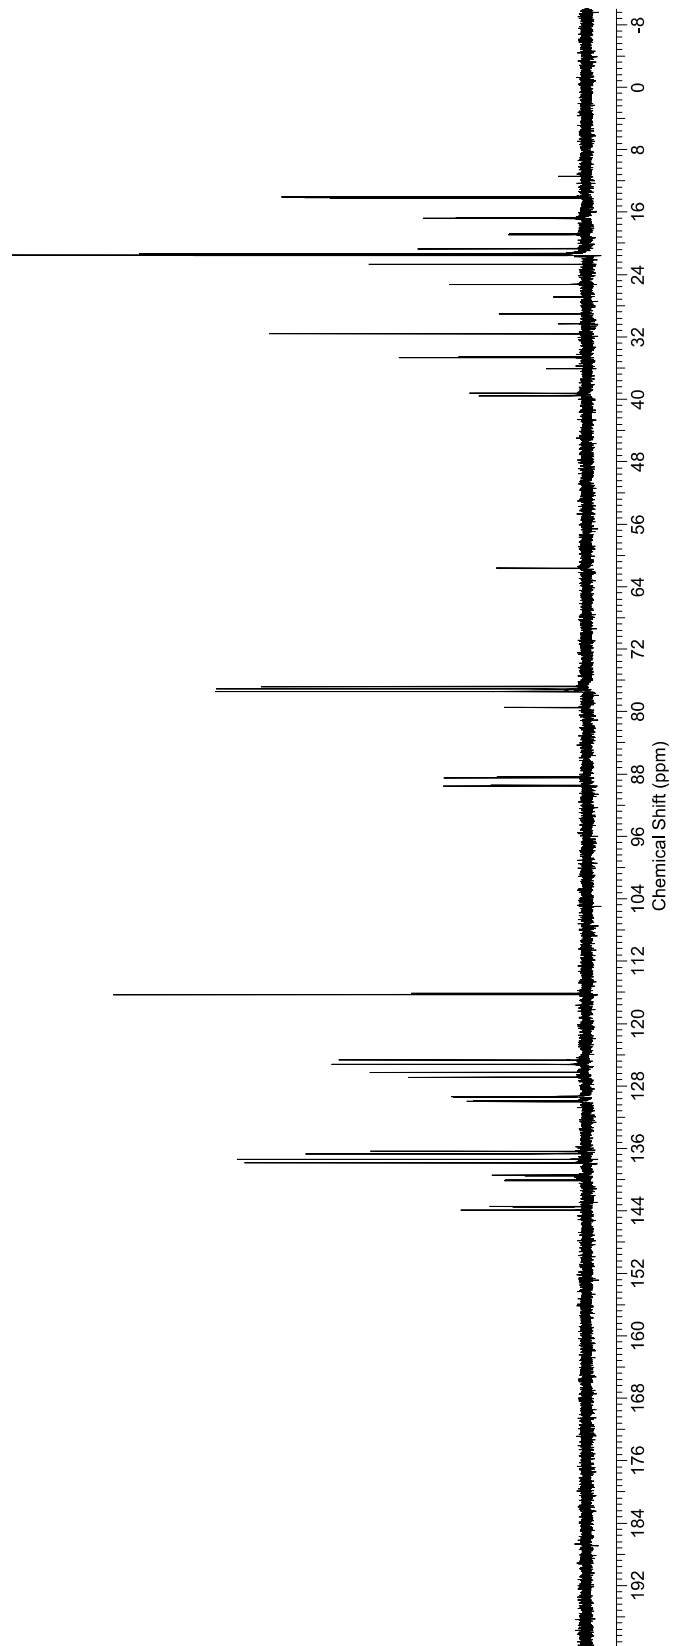

**(3*aR*,8*aR*)-2,2-dipropyl-4,4,8,8-tetrakis(3,5-dimethylphenyl)tetrahydro[1,3]-dioxolo[4,5-*e*][1,3,2]dioxaphosphepin-6-ol 6-oxide**

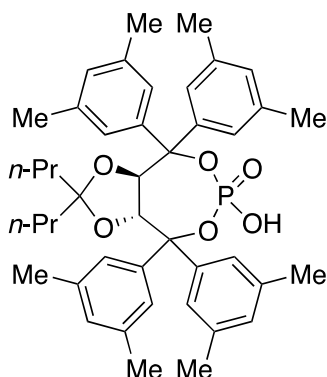

To a stirred solution of ester (2.92 g, 3.9 mmol) in dry CH<sub>2</sub>Cl<sub>2</sub> (40 mL) was added, dropwise at room temperature, DBU (0.61 mL, 4.1 mmol, 1.05 equiv). The solution was stirred 30 min at room temperature and when the reaction was complete by TLC, AcOH (0.3 mL) was added, followed by H<sub>2</sub>O (40 mL). The organic layer was then washed two times by a 0.3M HCl solution, saturated aqueous NaCl, and dried (MgSO<sub>4</sub>), filtered and concentrated. The residue was purified by column chromatography (SiO<sub>2</sub>; 0-10% IPA:CH<sub>2</sub>Cl<sub>2</sub>,) and concentrated *in vacuo*. The residue was diluted with CH<sub>2</sub>Cl<sub>2</sub> then washed with a solution of hydrochloric acid (10 mL, 0.3M aq. sol.) and concentrated *in vacuo* to provide the title compound (2.55 g, 3.7 mmol) as a white solid in 94% yield.

**TLC (SiO<sub>2</sub>):** R<sub>f</sub> = 0.43 (CH<sub>2</sub>Cl<sub>2</sub>:IPA = 100:5)

**m.p.:** 160-162 °C.

**<sup>1</sup>H NMR** (400 MHz, CDCl<sub>3</sub>): δ 9.41 (brs, 1H), 7.20 (s, 4H), 6.94 (s, 2H), 6.88 (s, 4H), 6.80 (s, 2H), 5.18 (s, 2H), 2.28 (s, 12H), 2.16 (s, 12H), 1.01-0.82 (m, 4H), 0.66-0.56 (m, 10 H).

**<sup>13</sup>C NMR** (100 MHz, CDCl<sub>3</sub>): δ 143.0, 140.1 (d, *J*<sub>P-C</sub> = 12.0 Hz), 137.3, 136.2, 129.8, 129.0, 126.3, 125.0, 116.6, 88.4, 79.2, 39.7, 21.5, 21.3, 16.6, 14.2.

**<sup>31</sup>P NMR** (162 MHz, CDCl<sub>3</sub>): δ -7.67.

**HRMS** (ESI) Calcd. for C<sub>43</sub>H<sub>52</sub>O<sub>6</sub>P [M]<sup>+</sup>: 695.35065, Found: 695.35070.

**FTIR** (neat): 2958, 2918, 1603, 1455, 1264, 1235, 1013, 737 cm<sup>-1</sup>.

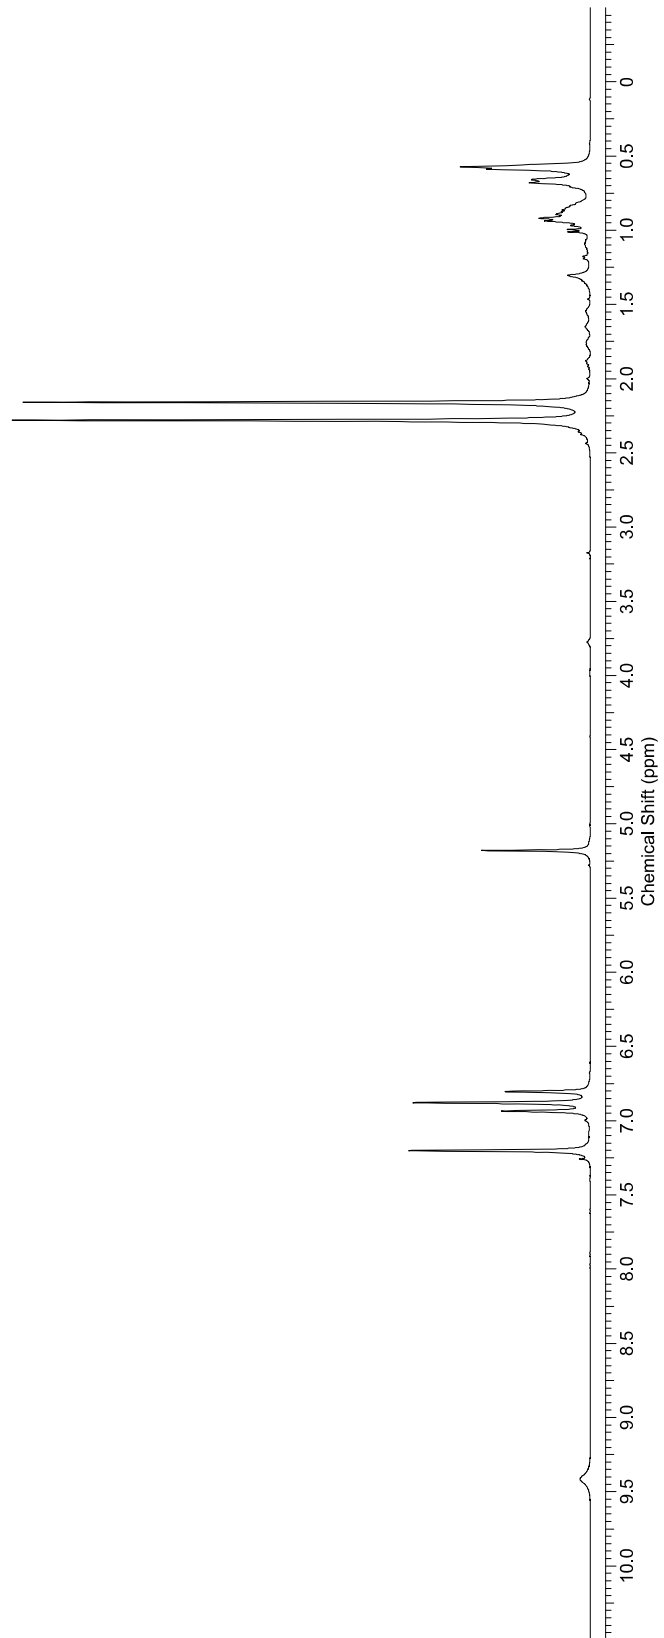

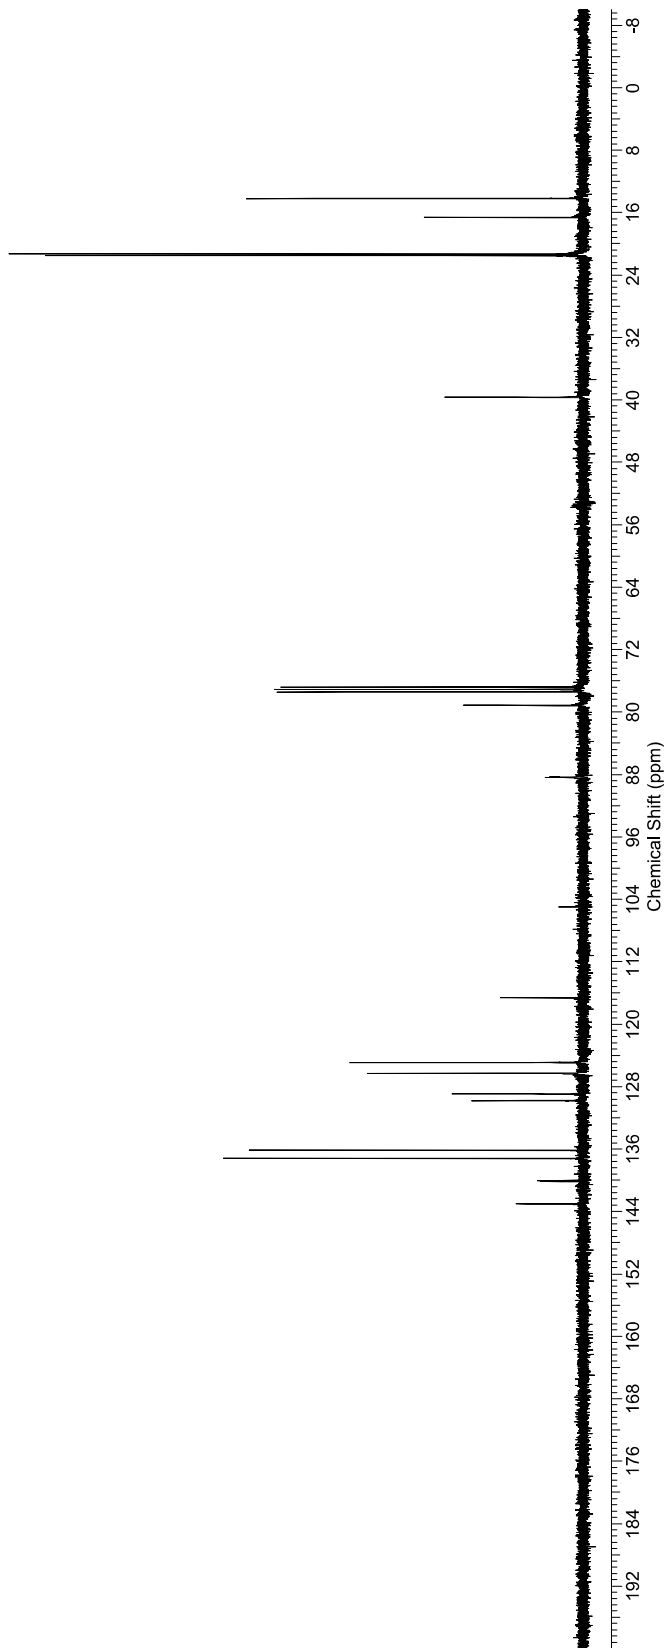

Supplement: NIHMS428905-supplement-2_si_002.pdf [file NIHMS428905-supplement-2_si_002.pdf]
